# Supplementary material
Source: PubMed Central journal article supplement (PMC4684715)
Supplement: NIHMS732570-supplement-1.pdf [file NIHMS732570-supplement-1.pdf]

Appendix B – Coded List of Identified Data Sources

| No. | Data ID | Publication Year | Title                                                                                                       | Journal                                                 | Relevance (0-5) | Rigor (0-5) | Industry/Setting                            | Patients | Practitioner | Hospital | National | Vendor | Design                        | Location       | Technology                    | Punctuated Equilibrium Component (D, E, R) | Theme(s) |       |
|-----|---------|------------------|-------------------------------------------------------------------------------------------------------------|---------------------------------------------------------|-----------------|-------------|---------------------------------------------|----------|--------------|----------|----------|--------|-------------------------------|----------------|-------------------------------|--------------------------------------------|----------|-------|
| 1   | 2       | 2004             | Development of a Web-Based Incident Reporting System in an Academic environment                             | Journal of the American Medical Informatics Association | 2               | 3           | Academic Medical Center                     |          |              | ●        | ●        |        | Case Study                    | Ohio           | Event-reporting system        | D,E                                        | 1,6      |       |
| 2   | 3       | 2004             | Alamance Regional Medical Center improves patient Safety with CPOE                                          | Journal of Health Information Management                | 2               | 2           |                                             |          |              |          | ●        |        | Case Study                    | North Carolina | CPOE                          | R                                          | 9        |       |
| 3   | 4       | 2004             | Physician Use of IT: Results from the Deloitte Research Survey                                              | Journal of Health Information Management                | 2               | 2           | Office                                      |          |              | ●        |          |        | Survey                        | National       | Any                           | D                                          | 1        |       |
| 4   | 5       | 2004             | How do integrated Delivery Systems Adopt and Implement Clinical Information Systems                         | Health Care Management Review                           | 2               | 3           |                                             |          |              | ●        | ●        |        | Case Study                    | National       | Various                       | E                                          | 6        |       |
| 5   | 6       | 2004             | Physicians: The Key to IT Success                                                                           | Trustee                                                 | 2               | 1           |                                             |          |              | ●        |          |        | Opinion                       |                |                               | D                                          | 1        |       |
| 6   | 13      | 2004             | Indianapolis I3: the third generation Integrated Advanced Informaiton System                                | Journal of the Medical Library Association              | 2               | 1           | Health System                               |          |              |          |          | ●      | Historical                    | Indiana        | Integrated Information System | D                                          | 1        |       |
| 7   | 14      | 2004             | Too much too soon?                                                                                          | Modern Healthcare                                       | 2               | 0           |                                             |          |              |          | ●        | ●      | Opinion                       |                |                               | D                                          | 3        |       |
| 8   | 15      | 2004             | Commercial Clinical Data Warehouses: From Wave of the Past to the State of the Art                          | Journal of Healthcare Information Management            | 2               | 3           | hospital                                    |          |              |          | ●        |        | survey                        | Texas          | Data Warehouse                | E                                          | 6        |       |
| 9   | 16      | 2004             | 10-year outline unveiled to roll out health information technology                                          | Quality Letter for Healthcare Leaders                   | 2               | 0           |                                             |          |              |          |          | ●      | Opinion                       | National       | Various                       | D                                          | 2        |       |
| 10  | 17      | 2004             | 'Most wired' hospitals widen gap over others                                                                | Healthcare Benchmarks & Quality Improvement             | 2               | 0           | hospital                                    |          |              |          | ●        |        | News Story                    | National       | various                       | D,E                                        | 2,3,8    |       |
| 11  | 18      | 2004             | the path to EHR                                                                                             | Healthcare Financial Management                         | 2               | 1           | General healthcare                          |          |              |          | ●        |        | Opinion                       | National       | EHR                           | R                                          | 10       |       |
| 12  | 19      | 2004             | The CEO and the future of technology. Panel discussion                                                      | Hospitals & health networks/AHA                         | 4               | 0           | hospitals                                   | ●        |              |          | ●        |        | New Story                     | National       | Various                       | R                                          | 9,10     |       |
| 13  | 20      | 2004             | Making IT ends meet. (cover story)                                                                          | Modern Healthcare                                       | 3               | 0           | Hospital                                    |          |              |          |          | ●      | News Story                    | Pennsylvania   | Various                       | E                                          | 6        |       |
| 14  | 23      | 2004             | Translating ideals for health information technology into practice                                          | Health affairs (Project Hope)                           | 3               | 1           |                                             |          |              | ●        |          | ●      | Opinion                       | National       | EHR                           | D,E                                        | 3,6      |       |
| 15  | 24      | 2004             | Opening the black box: Measuring hospital information technology capability                                 | Health Care Management Review                           | 2               | 4           | Hospital                                    |          |              |          | ●        |        | Cross sectional data analysis | National       | Various                       | E                                          | 7        |       |
| 16  | 25      | 2004             | Using electronic health records to help coordinate care                                                     | Milbank Quarterly                                       | 4               | 1           | Various                                     |          |              | ●        |          | ●      | Opinion                       | National       | EHR                           | E,R                                        | 9        |       |
| 17  | 33      | 2004             | Keynote address: medical informatics and emergency medicine                                                 | Academic Emergency Medicine                             | 3               | 1           | Emergency Department                        |          |              |          | ●        |        | Opinion                       | Washington, DC | Various                       | E                                          | 6        |       |
| 18  | 35      | 2004             | CIS: Where are we going and what should we demand from industry?                                            | Journal of critical care                                | 4               | 1           |                                             |          |              | ●        |          | ●      | Opinion                       | National       | VARIOUS                       | E                                          | 6        |       |
| 19  | 38      | 2004             | The evolution and implementation of a pediatric computerized order entry system: a case study               | Journal of healthcare information management: JHIM      | 2               | 2           | Large Healthcare System (Partners - Boston) |          |              |          | ●        |        | Case Study                    | Boston         | CPOE                          | E                                          | 6        |       |
| 20  | 40      | 2004             | Wiring Docs                                                                                                 | Hospitals & health networks/AHA                         | 3               | 1           |                                             |          |              | ●        | ●        |        | Opinion                       | National       | VARIOUS                       | E                                          | 6        |       |
| 21  | 45      | 2004             | How to succeed in health information technology                                                             | Health Affairs                                          | 3               | 1           | Various                                     |          |              | ●        |          |        | Opinion                       | National       | CPOE                          | D,E                                        | 2,4      |       |
| 22  | 46      | 2004             | Beyond usability: designing effective technology implementation systems to promote patient safety           | Quality and Safety in Health Care                       | 5               | 1           |                                             |          |              |          | ●        |        | Opinion                       | National       | Various                       | D,E                                        | 5,6      |       |
| 23  | 49      | 2004             | HIPAA implementation: measuring change and quality improvement                                              | Journal of healthcare information management: JHIM      | 1               | 2           | Long term care organziation                 |          |              | ●        | ●        |        | Case Study                    | unavailable    | HIPAA Compliance              | E                                          | 6        |       |
| 24  | 50      | 2004             | Transforming nursing practice: clinical systems and the nursing unit of the future                          | Journal of healthcare information management: JHIM      | 2               | 2           | Clarge Hospital System - Cleveland Clinic   |          |              | ●        | ●        |        | Case Study                    | Ohio           | Various                       | E                                          | -        |       |
| 25  | 53      | 2004             | Evolving to clinical terminology                                                                            | Journal of healthcare information management: JHIM      | 3               | 1           |                                             |          |              |          |          | ●      | ●                             | Opinion        | National                      | Standard Terminologies                     | E        | 6     |
| 26  | 55      | 2004             | Clinical information systems market-An insider's view                                                       | Journal of critical care                                | 2               | 1           |                                             |          |              |          | ●        |        | Opinion                       | Natoinal       | VARIOUS                       | E                                          | 6        |       |
| 27  | 59      | 2004             | Adoption Factors Associated with Patient Safety--Related Information Technology                             | Journal for Healthcare Quality                          | 3               | 3           | hospital                                    |          |              |          | ●        |        | survey                        | Florida        | Various                       | E,R                                        | 10       |       |
| 28  | 64      | 2004             | An assessment of the readiness of hospice organizations to accept technological innovation                  | Journal of Telemedicine and telecare                    | 3               | 3           | Hospice                                     | ●        | ●            |          |          |        | Survey                        | Missouri       | Telehealth                    | R                                          | 10       |       |
| 29  | 65      | 2004             | Overcoming barriers to adopting and implementing computerized physician order entry systems in US hospitals | Health Affairs                                          | 5               | 5           | Hospital                                    |          |              | ●        | ●        | ●      | ●                             | Case Study     | National                      | CPOE                                       | D,E,R    | 1,6,9 |
| 30  | 66      | 2004             | Win the technology marathon. Condition your practice for long-term IT strategy                              | MGMA connexion/Medical group Management Association     | 3               | 1           | Medical Practice                            |          |              | ●        |          |        | Opinion                       | New Jersey     | EMR System                    | E                                          | 6        |       |

Appendix B – Coded List of Identified Data Sources

| No. | Data ID | Publication Year | Title                                                                                                                            | Journal                                                                                     | Relevance (0-5) | Rigor (0-5) | Industry/Setting                 | Patients | Practitioner | Hospital | National | Vendor | Design                           | Location                      | Technology                       | Punctuated Equilibrium Component (D, E, R) | Theme(s) |   |
|-----|---------|------------------|----------------------------------------------------------------------------------------------------------------------------------|---------------------------------------------------------------------------------------------|-----------------|-------------|----------------------------------|----------|--------------|----------|----------|--------|----------------------------------|-------------------------------|----------------------------------|--------------------------------------------|----------|---|
| 31  | 73      | 2004             | New Technology Continues to Invade Healthcare: What are the Strategic Implications/Outcomes?                                     | Nursing Administration Quarterly                                                            | ☉ 1             | ☉ 1         | Nursing                          |          |              | ●        | ●        |        | Opinion                          |                               | Various                          | E,R                                        | 9,10     |   |
| 32  | 74      | 2004             | Superiority is complex                                                                                                           | Hospitals & health networks/AHA                                                             | ● 3             | ☉ 1         |                                  |          |              |          | ●        |        | Opinion                          |                               |                                  | D                                          | 1        |   |
| 33  | 75      | 2004             | The 100 most wired 2004                                                                                                          | Hospitals & health networks/AHA                                                             | ● 3             | ● 3         | hospital                         |          |              |          | ●        |        | Survey                           | National                      | Various                          | E                                          | 8        |   |
| 34  | 76      | 2004             | Health care's most wired. A wired exchange                                                                                       | Materials management in health care                                                         | ☉ 2             | ● 3         | Hospital                         |          |              |          | ●        |        | survey                           | national                      | Supply and Operations Management | E                                          | 6        |   |
| 35  | 77      | 2004             | Electronic health records: How close? How far to go                                                                              | NHPF Issue Brief                                                                            | ● 5             | ☉ 1         |                                  | ●        | ●            | ●        |          |        | Opinion                          | National                      | EMR                              | D,E,R                                      | 6        |   |
| 36  | 82      | 2004             | An adoption study of a clinical reminder system in ambulatory care using a developmental trajectory approach                     | Medinfo                                                                                     | ☉ 3             | ● 3         | hospital                         | ●        | ●            |          |          |        | Survey                           | Pennsylvania                  | CDSS                             | D,E                                        | 6        |   |
| 37  | 85      | 2005             | Way to go live: a framework for new IT implementation                                                                            | Healthcare financial management: journal of the Healthcare Financial Management Association | ☉ 2             | ☉ 1         |                                  |          | ●            | ●        |          | ●      | Opinion                          | National                      | Various                          | E                                          | -        |   |
| 38  | 86      | 2005             | Factors and forces affecting EHR system adoption: report of a 2004 ACMI discussion                                               | Journal of the American Medical Informatics Association                                     | ● 5             | ☉ 1         |                                  |          | ●            | ●        |          |        | Opinion                          | National                      | EHR, CPOE                        | D                                          | -        |   |
| 39  | 87      | 2005             | Adding insight: a qualitative cross-site study of physician order entry                                                          | International Journal of Medical Informatics                                                | ● 3             | ● 5         | Hospital                         |          | ●            | ●        |          |        | Case Study - Structured analysis | Virginia, Seattle, California | CPOE                             | D,R                                        | 4,10     |   |
| 40  | 88      | 2005             | Active error management: use of a Web-based reporting system to support patient safety initiatives                               | Journal of nursing administration                                                           | ☉ 2             | ☉ 2         | Hospital                         |          |              |          | ●        |        | Case Study                       | New Hampshire                 | Error Reporting                  | E                                          | 6        |   |
| 41  | 89      | 2005             | Rapid implementation of an electronic health record in an academic setting                                                       | Journal of Healthcare Information Management                                                | ☉ 1             | ☉ 2         | medical practice                 |          | ●            |          |          |        | Case Study                       | Washington, DC                | EHR                              | E                                          | 6        |   |
| 42  | 90      | 2005             | Quality as a passion                                                                                                             | Health Management Technology                                                                | ● 3             | ☉ 1         |                                  | ●        |              |          |          |        | Opinion                          |                               | Various                          | R                                          | 9        |   |
| 43  | 91      | 2005             | High and rising health care costs. Part 2: technologic innovation                                                                | Annals of internal medicine                                                                 | ● 4             | ☉ 1         | heaqlth System                   |          |              |          |          | ●      |                                  | Opinion                       | National                         | Various                                    | D        | 4 |
| 44  | 94      | 2005             | Making a commitment to IT                                                                                                        | Trustee                                                                                     | ● 3             | ☉ 1         | hospital                         |          | ●            | ●        |          |        | opinion                          | National                      | VARIOUS                          | E                                          | 6        |   |
| 45  | 99      | 2005             | The evolving role of supply chain management technology in healthcare                                                            | Journal of healthcare information management: JHIM                                          | ☉ 2             | ☉ 1         | hospital                         |          |              |          |          |        | Opinion                          | National                      | Supply Chain Management          | E                                          | 6        |   |
| 46  | 100     | 2005             | Uncle Sam wants your EHR                                                                                                         | Hospitals & Health Networks                                                                 | ☉ 2             | ☉ 1         |                                  |          |              |          |          |        | Opinion                          | National                      | EHR                              | R                                          | 9        |   |
| 47  | 102     | 2005             | What works.(Almost) immediate gratification. WellStar Physicians Group                                                           | Health Management Technology                                                                | ☉ 1             | ☉ 2         | Medical Group                    |          | ●            |          |          |        | Case Study                       | Georgia                       | Claims Payment/Billing           | E                                          | 8        |   |
| 48  | 104     | 2005             | A review and a framework of handheld computer adoption in healthcare                                                             | International Journal of Medical Informatics                                                | ☉ 2             | ● 4         | Various                          |          | ●            |          |          |        | literature review                | National                      | Mobile health                    | D                                          | 1        |   |
| 49  | 105     | 2005             | Returns, not burns: how to ensure successful health IT investments                                                               | Healthcare financial management: journal of the Healthcare Financial Management Association | ● 3             | ☉ 1         |                                  |          |              | ●        |          |        | Opinion                          |                               | Various                          | E                                          | 8        |   |
| 50  | 106     | 2005             | Accelerating US EHR adoption: How to get there from here. Recommendations based on the 2004 ACMI retreat                         | Journal of the American Medical Informatics Association                                     | ● 5             | ☉ 1         |                                  |          | ●            | ●        | ●        | ●      | Opinion                          | National                      | EHR                              | D,R                                        | 4,9      |   |
| 51  | 108     | 2005             | Factors related to physicians' adoption of electronic prescribing: results from a national survey                                | American Journal of Medical Quality                                                         | ● 3             | ● 3         | Outpatient                       |          | ●            |          |          |        | Survey                           | National                      | Electronic Prescribing           | D,E                                        | 1,6      |   |
| 52  | 109     | 2005             | The Kaiser Permanente IT transformation                                                                                          | Healthcare financial management: journal of the Healthcare Financial Management Association | ● 3             | ☉ 2         | IDS - integrated delivery system |          |              |          | ●        |        | Case Study                       | Western US                    | Various                          | E                                          | 8        |   |
| 53  | 110     | 2005             | Economic evaluation of medical technologies                                                                                      | Israel Medical Association Journal: Imaj                                                    | ☉ 2             | ☉ 1         |                                  |          | ●            | ●        |          | ●      | Opinion                          | National                      | VARIOUS                          | E                                          | 8        |   |
| 54  | 112     | 2005             | Making Sausage--Effective Management of Enterprise-wide Clinical IT Projects                                                     | Journal of Healthcare Information Management                                                | ● 3             | ☉ 2         | hospital                         |          |              |          | ●        |        | Case Study                       | Alabama                       | Various                          | E                                          | 8        |   |
| 55  | 115     | 2005             | Factors influencing health information system adoption in American hospitals                                                     | Health Care Management Review                                                               | ● 5             | ● 4         | Hospital                         |          |              | ●        |          |        | Cross sectional Study            | National                      | Various                          | D                                          | 1        |   |
| 56  | 116     | 2005             | Five steps to electronic health record success                                                                                   | Healthcare Financial Management                                                             | ☉ 2             | ☉ 1         | Various                          |          |              |          | ●        |        | Opinion                          | National                      | EHR                              | E                                          | 6        |   |
| 57  | 117     | 2009             | Paper Versus Electronic Medical Records: The Effects of Access on Physicians' Decisions to Use Complex Information Technologies* | Decision Sciences                                                                           | ● 4             | ● 3         | hospital                         |          | ●            |          |          |        | survey                           | Unknown                       | EMR                              | D,R                                        | 5,10     |   |
| 58  | 119     | 2004             | 2004 TOP HEALTH CARE BUSINESS ISSUES                                                                                             | Trustee                                                                                     | ☉ 1             | ○ 0         | hospital                         |          |              |          | ●        |        | News                             | national                      | Various                          | E                                          | -        |   |

Appendix B – Coded List of Identified Data Sources

| No. | Data ID | Publication Year | Title                                                                                                                                                 | Journal                                     | Relevance (0-5) | Rigor (0-5) | Industry/Setting   |  |  |  |  |  | Design            | Location      | Technology   | Punctuated Equilibrium Component (D, E, R) | Theme(s) |
|-----|---------|------------------|-------------------------------------------------------------------------------------------------------------------------------------------------------|---------------------------------------------|-----------------|-------------|--------------------|--|--|--|--|--|-------------------|---------------|--------------|--------------------------------------------|----------|
|     |         |                  |                                                                                                                                                       |                                             |                 |             |                    |  |  |  |  |  |                   |               |              |                                            |          |
| 59  | 120     | 2004             | AHIMA's electronic record standards                                                                                                                   | AHA News                                    | 1               | 0           | national           |  |  |  |  |  | news              | National      | EHR          | E                                          | -        |
| 60  | 122     | 2004             | Issues in Clinical Transformation                                                                                                                     | H&HN: Hospitals & Health Networks           | 3               | 0           | hospital           |  |  |  |  |  | news              | National      | Various      | D                                          | 1        |
| 61  | 123     | 2004             | Digital pens and paper show e-prescribing promise                                                                                                     | Drug Store News                             | 1               | 0           | hospital           |  |  |  |  |  | News              | New Jersey    | eRx          | E                                          | -        |
| 62  | 124     | 2004             | Clinical transformation initiative starts with a total vision                                                                                         | Managed Healthcare Executive                | 1               | 0           | hospital           |  |  |  |  |  | News              | National      | Various      | E                                          | -        |
| 63  | 127     | 2004             | E-Health Revives Health-Care IT                                                                                                                       | Informationweek                             | 1               | 0           | Hospital           |  |  |  |  |  | news              | National      | Various      | E                                          | 6        |
| 64  | 128     | 2004             | FEDS TARGET HEALTH-CARE I.T                                                                                                                           | Informationweek                             | 1               | 0           | National           |  |  |  |  |  | News              | Naitonal      | Various      | R                                          | 9        |
| 65  | 130     | 2004             | Transform workflow through selective implementation                                                                                                   | Nursing Management                          | 1               | 0           | Hospital           |  |  |  |  |  | News              | national      | CPOE         | E                                          | -        |
| 66  | 134     | 2005             | HIT and MIS: IMPLICATIONS OF HEALTH INFORMATION TECHNOLOGY AND MEDICAL INFORMATION SYSTEMS                                                            | Communications of the ACM                   | 4               | 1           | national system    |  |  |  |  |  | Opinion           | national      | Various      | D,E                                        | 2,6      |
| 67  | 135     | 2005             | Transforming Care: Medical Practice Design And Information Technology                                                                                 | Health Affairs                              | 4               | 1           |                    |  |  |  |  |  | Opinion           | Oregon        | Various      | D,E                                        | 4        |
| 68  | 136     | 2005             | Achieving the Vision of EHR -- Take the Long View                                                                                                     | Frontiers of Health Services Management     | 4               | 1           | national           |  |  |  |  |  | Opinion           | national      | Various      | R                                          | 9        |
| 69  | 137     | 2005             | Achieving U.S. Health Information Technology Adoption: The Need For A Third Hand                                                                      | Health Affairs                              | 5               | 1           |                    |  |  |  |  |  | Opinion           | National      | Various      | D,R                                        | 4,9      |
| 70  | 139     | 2005             | Transforming the Health System from the Inside Out                                                                                                    | Frontiers of Health Services Management     | 3               | 1           |                    |  |  |  |  |  | Opinion           | National      | Various      | R                                          | -        |
| 71  | 140     | 2005             | The Missing Link: Bridging The Patient- Provider Health Information Gap                                                                               | Health Affairs                              | 5               | 1           |                    |  |  |  |  |  | Opinion           | national      | PHR          | R                                          | 9        |
| 72  | 142     | 2005             | Promoting Health Information Technology: Is There A Case For More-Aggressive Government Action?                                                       | Health Affairs                              | 4               | 2           | National           |  |  |  |  |  | Policy analysis   | National      | Various      | E,R                                        | 6,9      |
| 73  | 143     | 2006             | Newt Gingrich: healthcare transformation advocate                                                                                                     |                                             | 1               | 0           | National           |  |  |  |  |  | News              | National      | Various      | D,R                                        | 4,9      |
| 74  | 144     | 2006             | Gingrich Speaks To IT Industry                                                                                                                        | VARBusiness                                 | 1               | 0           | National           |  |  |  |  |  | News              | National      | Various      | R                                          | 9        |
| 75  | 147     | 2006             | health care in crisis: is HIT the Rx?                                                                                                                 | hfm (Healthcare Financial Management)       | 3               | 0           | national           |  |  |  |  |  | News              | National      | Various      | R                                          | 9        |
| 76  | 151     | 2007             | Getting to the Point. (cover story)                                                                                                                   | Health Management Technology                | 2               | 0           | Hospital           |  |  |  |  |  | Case Study/News   | Illinois      | Mobile Carts | E                                          | -        |
| 77  | 152     | 2007             | THE INTERACTION OF INSTITUTIONALLY TRIGGERED AND TECHNOLOGY-TRIGGERED SOCIAL STRUCTURE CHANGE: AN INVESTIGATION OF COMPUTERIZED PHYSICIAN ORDER ENTRY | MIS Quarterly                               | 3               | 2           | Hospital           |  |  |  |  |  | Case Study        | Unknown       | CPOE         | E                                          | 6        |
| 78  | 153     | 2007             | The Right Mix                                                                                                                                         | Health Management Technology                | 1               | 0           | Hospital           |  |  |  |  |  | Case Study / News | West Virginia | EHR          | E                                          | 6        |
| 79  | 157     | 2007             | PERSPECTIVE: Moving Closer To A Rapid-Learning Health Care System                                                                                     | Health Affairs                              | 3               | 1           | naitonal           |  |  |  |  |  | opinion           | National      | Various      | R                                          | 9        |
| 80  | 158     | 2007             | ENTERPRISE ARCHITECTURE MATURITY: THE STORY OF THE VETERANS HEALTH ADMINISTRATION                                                                     | MIS Quarterly Executive                     | 4               | 2           | Hospital VA system |  |  |  |  |  | Case Study        | National      | Various      | R                                          | -        |
| 81  | 164     | 2008             | Health Care Sheds Its Tech-Laggard Ways                                                                                                               | Informationweek                             | 3               | 0           | hospital           |  |  |  |  |  | News              | National      | Various      | E                                          | 6        |
| 82  | 165     | 2008             | Beginning at the End                                                                                                                                  | Health Management Technology                | 2               | 0           | Hospital           |  |  |  |  |  | news              | National      | Various      | E                                          | 6        |
| 83  | 167     | 2009             | People, Get Ready                                                                                                                                     | H&HN: Hospitals & Health Networks           | 1               | 0           | National           |  |  |  |  |  | News              | National      | Various      | D,R                                        | 3,9      |
| 84  | 168     | 2009             | Bon Secours Health System integrates Lean Six Sigma and Knowledge Transfer to drive clinical and operational excellence                               | Global Business & Organizational Excellence | 2               | 0           | hospital           |  |  |  |  |  | Case Study / news | Maryland      | Various      | R                                          | 10       |
| 85  | 169     | 2009             | Bound for Connectivity                                                                                                                                | Health Management Technology                | 2               | 0           | DOH                |  |  |  |  |  | Case Study / News | New mexico    | Various      | E                                          | 6        |
| 86  | 170     | 2009             | Workflow Automation: Building Compliance into Health Care Systems                                                                                     | Journal of Health Care Compliance           | 1               | 0           | naitonal           |  |  |  |  |  | news              | National      | Various      | E                                          | 6        |
| 87  | 172     | 2009             | Training Critical Element to HIT Deployment                                                                                                           | Modern Healthcare                           | 1               | 0           | Various            |  |  |  |  |  | news              | National      | Various      | R                                          | 10       |
| 88  | 173     | 2009             | Going All-Digital is Easier Said Than Done                                                                                                            | Physician Executive                         | 2               | 0           | Hospital           |  |  |  |  |  | News              | Florida       | Various      | E                                          | 6        |
| 89  | 174     | 2010             | The Digital Transformation of Healthcare: Current Status and the Road Ahead                                                                           | Information Systems Research                | 5               | 1           | naitonal System    |  |  |  |  |  | opinion           | national      | Various      | D,R                                        | 3,9      |
| 90  | 177     | 2010             | Working on IT                                                                                                                                         | Modern Healthcare                           | 4               | 0           | National System    |  |  |  |  |  | Opinion           | national      | Various      | E                                          | 6        |
| 91  | 178     | 2010             | Beyond Innovation                                                                                                                                     | Informationweek                             | 2               | 0           | Hospital           |  |  |  |  |  | News              | Pennsylvania  | Various      | E                                          | -        |
| 92  | 182     | 2011             | Tablets, mobile apps transform pharmacy                                                                                                               | Drug Store News                             | 3               | 0           | Pharmacy           |  |  |  |  |  | News              | Naitonal      | Pharmacy     | E                                          | -        |
| 93  | 184     | 2011             | Clinician Adoption of Technology                                                                                                                      | Physician Executive                         | 2               | 0           | national           |  |  |  |  |  | news              | national      | Various      | D                                          | 3        |

Appendix B – Coded List of Identified Data Sources

| No. | Data ID | Publication Year | Title                                                                                                                                      | Journal                                                                                                          | Relevance (0-5) | Rigor (0-5) | Industry/Setting                        | Patients | Practitioner | Hospital | National | Vendor | Design                              | Location        | Technology         | Punctuated Equilibrium Component (D, E, R) | Theme(s) |
|-----|---------|------------------|--------------------------------------------------------------------------------------------------------------------------------------------|------------------------------------------------------------------------------------------------------------------|-----------------|-------------|-----------------------------------------|----------|--------------|----------|----------|--------|-------------------------------------|-----------------|--------------------|--------------------------------------------|----------|
| 94  | 185     | 2011             | That's nice, but what does IT do? Evaluating the impact of bar coded medication administration by measuring changes in the process of care | International Journal of Industrial Ergonomics                                                                   | 3               | 3           | hospital                                |          |              |          |          |        | Pre-Post experiment                 | National        | Bar Code           | E                                          | 6        |
| 95  | 187     | 2011             | Today's monolithic EMRs delay hope for the 'learning health system'                                                                        | Managed Healthcare Executive                                                                                     | 5               | 0           | national                                |          |              |          |          |        | news                                | National        | EHR                | D                                          | 3        |
| 96  | 188     | 2011             | Leading from the Future: Leadership Makes a Difference During Electronic Health Record Implementation                                      | Frontiers of Health Services Management                                                                          | 3               | 1           | Hospital                                |          |              |          |          |        | opinion                             | national        | Various            | R                                          | 10       |
| 97  | 192     | 2011             | Dynamic Capabilities in Home Health: IT-Enabled Transformation of Post-Acute Care                                                          | Journal of the Association for Information Systems                                                               | 3               | 2           | Home Health Care                        |          |              |          |          |        | Csae Study                          | Georgia         | Various            | E                                          | 6        |
| 98  | 193     | 2011             | Computing Power Is Transforming Health Care, At Long Last                                                                                  | Forbes.com                                                                                                       | 1               | 0           | national                                |          |              |          |          |        | news                                | National        | Various            | D                                          | 1        |
| 99  | 194     | 2012             | Healthcare Sector Is Finally Ripe for Change                                                                                               | Channel Insider                                                                                                  | 1               | 0           | National                                |          |              |          |          |        | News                                | National        | Various            | D                                          | 1        |
| 100 | 197     | 2004             | Medical Ghost in the E-Health Machine, A                                                                                                   | Health Matrix                                                                                                    | 4               | 1           | National                                |          |              |          |          |        | Opinion                             | National        | eHealth            | D                                          | 2        |
| 101 | 198     | 2006             | TECHNOLOGY-ENABLED TRANSFORMATIONS IN US HEALTH CARE                                                                                       | Human-computer interaction and management information systems: applications                                      | 3               | 3           | Unknown                                 |          |              |          |          |        | Cross Sectional Survey              | Naitional       | PHR                | D                                          | 1        |
| 102 | 199     | 2008             | Digital Quality of Life: Health Care                                                                                                       | Digital Quality of Life: Understanding the Personal and Social Benefits of the Information Technology Revolution | 2               | 1           | Hospital                                |          |              |          |          |        | Opinion                             | National        | Varoius            | E                                          | -        |
| 103 | 200     | 2011             | Electronic Medical Records and Physician Productivity: Evidence from Panel Data Analysis                                                   |                                                                                                                  | 3               | 4           | Outpatient Clinics at Academic Hospital |          |              |          |          |        | Observational (Pre-post comparison) | Western US      | EMR System         | D                                          | 1        |
| 104 | 201     | 2004             | Show them the money. Healthcare providers say it will take more than vision to turn the government's health IT plans into reality          | Modern Healthcare                                                                                                | 4               | 1           | General                                 |          |              |          |          |        | Opinion                             | National        | Various            | D,E                                        | 4,6      |
| 105 | 261     | 2005             | The impact on patient safety of free-text entry of nursing orders into an electronic medical record in an integrated delivery system       | American Medical Informatics Association                                                                         | 2               | 3           | hospital                                |          |              |          |          |        | observational                       | Illinois        | Nusing Order Entry | E                                          | 6        |
| 106 | 262     | 2005             | Building a results review system: a critical first step in transitioning from paper medical records                                        | American Medical Informatics Association                                                                         | 3               | 3           | hospital                                |          |              |          |          |        | Pre-Post implementation survey      | Louisiana       | Various            | E                                          | 6        |
| 107 | 264     | 2005             | An electronic health record-public health (EHR-PH) system prototype for interoperability in 21st century healthcare systems                | American Medical Informatics Association                                                                         | 3               | 2           | Public health                           |          |              |          |          |        | Case Study                          | Unknown         | HIE                | E                                          | 6        |
| 108 | 265     | 2005             | Managing the alert process at NewYork-Presbyterian Hospital                                                                                | American Medical Informatics Association                                                                         | 2               | 2           | hospital                                |          |              |          |          |        | Case study                          | New York        | CDSS               | E                                          | 6        |
| 109 | 266     | 2005             | Human and system errors, using adaptive turnaround documents to capture data in a busy practice                                            | American Medical Informatics Association                                                                         | 3               | 2           |                                         |          |              |          |          |        | Case Study                          |                 |                    | D                                          | -        |
| 110 | 267     | 2005             | Physician use of electronic medical records: issues and successes with direct data entry and physician productivity                        | American Medical Informatics Association                                                                         | 3               | 3           | medical system                          |          |              |          |          |        | Observational                       | Utah            | EHR                | E                                          | 6        |
| 111 | 269     | 2005             | Connecting the providers in your healthcare community: one step at a time                                                                  | Frontiers of Health Services Management                                                                          | 3               | 1           |                                         |          |              |          |          |        | opinion                             | national        | varoius            | E                                          | 6        |
| 112 | 272     | 2005             | 'Tablet' makes for good medicine. Case study: tablet-style computers can enhance physician satisfaction, revenue stream                    | MGMA connexion/Medical group Management Association                                                              | 1               | 2           | medical group                           |          |              |          |          |        | case study                          | Kansas          | Billing/Coding     | E                                          | 8        |
| 113 | 273     | 2005             | Research opportunities and challenges in 2005                                                                                              | Methods of information in medicine                                                                               | 3               | 1           |                                         |          |              |          |          |        | Opinion                             | National        | EHR                | D                                          | 3        |
| 114 | 277     | 2005             | Leading the Charge                                                                                                                         | Hospitals & health networks/AHA                                                                                  | 3               | 1           | health system                           |          |              |          |          |        | Opinion                             | DoD             | EHR                | E                                          | 8        |
| 115 | 278     | 2005             | Action through collaboration: a conversation with David Brailer. Interview by Robert Cunningham                                            | Health affairs (Project Hope)                                                                                    | 4               | 1           |                                         |          |              |          |          |        | Interview                           | National        | Various            | D,R                                        | 1,3,4,9  |
| 116 | 283     | 2005             | Competition and new technology                                                                                                             | Health Affairs                                                                                                   | 5               | 1           |                                         |          |              |          |          |        | Opinion                             | national        | varoius            | D                                          | 4        |
| 117 | 286     | 2005             | The patient safety institute demonstration project: a model for implementing a local health information infrastructure                     | Journal of healthcare information management: JHIM                                                               | 3               | 2           | hospital group                          |          |              |          |          |        | Case Study                          | Washington (WA) | HIE                | E                                          | 6,8      |

Appendix B – Coded List of Identified Data Sources

| No. | Data ID | Publication Year | Title                                                                                                                                   | Journal                                                       | Relevance (0-5) | Rigor (0-5) | Industry/Setting        | Patients | Practitioner | Hospital | National | Vendor | Design               | Location     | Technology              | Punctuated Equilibrium Component (D, E, R) | Theme(s) |
|-----|---------|------------------|-----------------------------------------------------------------------------------------------------------------------------------------|---------------------------------------------------------------|-----------------|-------------|-------------------------|----------|--------------|----------|----------|--------|----------------------|--------------|-------------------------|--------------------------------------------|----------|
| 118 | 287     | 2005             | Environments for innovation in healthcare information technology                                                                        | Journal of Healthcare Information Management                  | 3               | 1           |                         |          |              |          |          |        | opinion              | national     | various                 | D                                          | 1        |
| 119 | 288     | 2005             | Information technology: changing nursing processes at the point-of-care                                                                 | Nursing Administration Quarterly                              | 2               | 2           | telehealth              |          |              |          |          |        | case study           | unknown      | telehomecare            | E                                          | 6        |
| 120 | 291     | 2005             | Emerging benefits of integrated IT systems                                                                                              | Healthcare executive                                          | 2               | 1           | hospital                |          |              |          |          |        | opinion              | national     | various                 | E                                          | 8        |
| 121 | 292     | 2005             | The transformational power of IT: Experience from patient safety leaders                                                                | Healthcare executive                                          | 2               | 2           | hospital                |          |              |          |          |        | Case Study           | maine        | Various                 | E                                          | 6        |
| 122 | 293     | 2005             | Making the healthcare system safer with innovation and technology                                                                       | Quality Letter for Healthcare Leaders                         | 3               | 1           | Ambulatory/Outpatient   |          |              |          |          |        | Opinion              | national     | VARIOUS                 | D,E                                        | -        |
| 123 | 294     | 2005             | The adoption gap: health information technology in small physician practices                                                            | Health Affairs                                                | 3               | 1           | group practice          |          |              |          |          |        | Opinion              | national     | EHR                     | D                                          | -        |
| 124 | 295     | 2005             | Medical groups' adoption of electronic health records and information systems                                                           | Health Affairs                                                | 3               | 3           | Outpatient              |          |              |          |          |        | Survey               | National     | EHR                     | D                                          | 1        |
| 125 | 298     | 2005             | Functional gaps in attaining a national health information network                                                                      | Health Affairs                                                | 4               | 1           |                         |          |              |          |          |        | Opinion              | national     | NHIN                    | E                                          | 6        |
| 126 | 299     | 2005             | Achieving US health information technology adoption: the need for a third hand                                                          | Health Affairs                                                | 5               | 1           |                         |          |              |          |          |        | opinion              | national     | Various                 | D                                          | 4        |
| 127 | 300     | 2005             | Federal investment in health information technology: how to motivate it?                                                                | Health Affairs                                                | 5               | 3           |                         |          |              |          |          |        | Opinion              | national     | Various                 | D                                          | 4        |
| 128 | 301     | 2005             | Dot-gov: market failure and the creation of a national health information technology system                                             | Health Affairs                                                | 5               | 3           |                         |          |              |          |          |        | Opinion              | National     | VARIOUS                 | D                                          | 2        |
| 129 | 303     | 2005             | Strategic action in health information technology: why the obvious has taken so long                                                    | Health Affairs                                                | 3               | 1           |                         |          |              |          |          |        | Opinion              | National     | Various                 | D,E                                        | 2,4,6    |
| 130 | 304     | 2005             | State and community-based efforts to foster interoperability                                                                            | Health Affairs                                                | 3               | 2           | Statewide HIE           |          |              |          |          |        | Case Study           | Tennessee    | HIE                     | R                                          | 10       |
| 131 | 305     | 2005             | Medicare's next voyage: encouraging physicians to adopt health information technology                                                   | Health Affairs                                                | 3               | 1           | national healthcare     |          |              |          |          |        | Opinion              | National     | EMR                     | R                                          | 9        |
| 132 | 306     | 2005             | Can electronic medical record systems transform health care? Potential health benefits, savings, and costs                              | Health Affairs                                                | 4               | 2           | Healthcare Market       |          |              |          |          |        | Case Study           | National     | EMR                     | E                                          | 6        |
| 133 | 307     | 2005             | Practice to evidence to practice: closing the loop with IT                                                                              | Nursing Management                                            | 2               | 1           | Various                 |          |              |          |          |        | Opinion              | National     | Evidenced Based Nursing | E                                          | 6        |
| 134 | 308     | 2005             | Comparing knowledge management in health-care and technical support organizations                                                       | Information Technology in Biomedicine, IEEE Transactions on   | 2               | 2           | Hospital vs. IT Support |          |              |          |          |        | Case Study           | Unknown      | Knowledge Management    | D                                          | 2        |
| 135 | 309     | 2005             | The 100 most wired 2005: the quality connection                                                                                         | Hospitals & health networks/AHA                               | 2               | 3           | Hospital                |          |              |          |          |        | Survey               | National     | Various                 | E                                          | -        |
| 136 | 312     | 2005             | Toward a procedure for integrating moral issues in health technology assessment                                                         | International Journal of Technology Assessment in Health Care | 4               | 1           | Various                 |          |              |          |          |        | Opinion              | Unknown      | Various                 | E                                          | 7        |
| 137 | 313     | 2005             | Information technologies in Florida's rural hospitals: does system affiliation matter?                                                  | The Journal of Rural Health                                   | 1               | 3           | rural hospitals         |          |              |          |          |        | survey               | Florida      | Various                 | D                                          | 1        |
| 138 | 319     | 2005             | Ease on down the road. Start technology implementation with care and foresight                                                          | MGMA connexion/Medical group Management Association           | 2               | 1           | Clinician               |          |              |          |          |        | Opinion              | VARIOUS      | EHR                     | E                                          | 6        |
| 139 | 323     | 2005             | Physician reimbursement and technology adoption                                                                                         | Journal of Health Economics                                   | 3               | 1           |                         |          |              |          |          |        | Quantitative Model   | National     | Various                 | D                                          | 4        |
| 140 | 324     | 2006             | Information technology strategy: three misconceptions                                                                                   | Journal of Healthcare Information Management                  | 2               | 1           |                         |          |              |          |          |        | Opinion              | National     | Various                 | R                                          | 9        |
| 141 | 325     | 2006             | Antecedents of clinical information technology sophistication in hospitals                                                              | Health Care Management Review                                 | 5               | 3           | hospital                |          |              |          |          |        | Survey/National Data | iowa         | Various                 | R                                          | 10       |
| 142 | 326     | 2006             | Crossing the quality chasm: the role of information technology departments                                                              | American Journal of Medical Quality                           | 2               | 3           | IDS (VA)                |          |              |          |          |        | Delphi Survey        | National     | Various                 | R                                          | 10       |
| 143 | 330     | 2006             | A critical change in a day in the life of intensive care nurses: Rising to the e-challenge of an integrated clinical information system | Critical care nursing quarterly                               | 2               | 2           | hospital ICU            |          |              |          |          |        | Case Study           | Pennsylvania | CPOE                    | E                                          | -        |
| 144 | 331     | 2006             | Innovation in surgery: a historical perspective                                                                                         | Annals of surgery                                             | 5               | 2           |                         |          |              |          |          |        | Case Study           | historical   | Endoscopy               | D                                          | -        |
| 145 | 333     | 2006             | Expanding the scope of health information systems                                                                                       | IMIA Yearbook of Medical Informatics                          | 2               | 1           |                         |          |              |          |          |        | Opinion              | National     | Various                 | E                                          | 6        |
| 146 | 334     | 2006             | Computerized provider order entry system field research: The impact of contextual factors on study implementation                       | International Journal of Medical Informatics                  | 3               | 2           | IDS                     |          |              |          |          |        | Case Study           | California   | CPOE                    | D                                          | 1        |

Appendix B – Coded List of Identified Data Sources

| No. | Data ID | Publication Year | Title                                                                                                                                                              | Journal                                                                                     | Relevance (0-5) | Rigor (0-5) | Industry/Setting         | Patients | Practitioner | Hospital | National | Vendor | Design                                           | Location     | Technology                 | Punctuated Equilibrium Component (D, E, R) | Theme(s) |
|-----|---------|------------------|--------------------------------------------------------------------------------------------------------------------------------------------------------------------|---------------------------------------------------------------------------------------------|-----------------|-------------|--------------------------|----------|--------------|----------|----------|--------|--------------------------------------------------|--------------|----------------------------|--------------------------------------------|----------|
| 147 | 338     | 2006             | Types of unintended consequences related to computerized provider order entry                                                                                      | Journal of the American Medical Informatics Association                                     | 3               | 3           | hospital                 |          |              |          |          |        | Observational                                    | MA, IN, NC   | CPOE                       | E                                          | 6        |
| 148 | 340     | 2006             | EHR and other IT adoption among physicians: results of a large-scale statewide analysis                                                                            | Journal of Healthcare Information Management                                                | 3               | 3           | outpatient               |          |              |          |          |        | survey                                           | Florida      | Various                    | D                                          | 1        |
| 149 | 341     | 2006             | The California Clinical Data Project: a case study in the adoption of clinical data standards for quality improvement                                              | Journal of Healthcare Information Management                                                | 3               | 2           | health system            |          |              |          |          |        | Case Study                                       | California   | HIE                        | E                                          | 6        |
| 150 | 342     | 2006             | Concepts for building inter-organizational systems in healthcare: lessons from other industries                                                                    | Journal of Healthcare Information Management                                                | 5               | 1           | HIE                      |          |              |          |          |        | Opinion                                          | National     | HIE                        | D                                          | 1        |
| 151 | 343     | 2006             | Health care IT adoption could save USD162 billion                                                                                                                  | World Hospitals and Health Services                                                         | 3               | 1           | Health System            |          |              |          |          |        | Opinion                                          | National     | Various                    | R                                          | 9        |
| 152 | 345     | 2006             | When it comes to IT, ED managers lag behind                                                                                                                        | ED Management                                                                               | 1               | 0           | ED                       |          |              |          |          |        | News Story                                       |              | ED                         | E                                          | -        |
| 153 | 346     | 2006             | Evidence-based practice: How nursing administration makes IT happen                                                                                                | Nursing Administration Quarterly                                                            | 1               | 1           |                          |          |              |          |          |        | opinion                                          | National     | Various                    | E                                          | -        |
| 154 | 347     | 2006             | Using diffusion of innovation concepts to enhance implementation of an electronic health record to support evidence-based practice                                 | Nursing Administration Quarterly                                                            | 3               | 1           | hospital                 |          |              |          |          |        | opinion                                          | National     | EHR                        | D                                          | 5        |
| 155 | 348     | 2006             | Barriers to accepting e-prescribing in the USA                                                                                                                     | International Journal of Health Care Quality Assurance                                      | 3               | 3           | eRx                      |          |              |          |          |        | Survey                                           | Pennsylvania | Eprescribing               | E                                          | 6        |
| 156 | 349     | 2006             | Hospital organization culture, capacity to innovate and success in technology adoption                                                                             | Journal of health organization and management                                               | 5               | 4           | hospital                 |          |              |          |          |        | Factor analysis and survey                       | National     | Various                    | D,R                                        | 5,10     |
| 157 | 350     | 2006             | Managing the ice in the waters ahead: lessons from the Titanic                                                                                                     | Healthcare financial management: journal of the Healthcare Financial Management Association | 1               | 1           |                          |          |              |          |          |        | Opinion                                          | National     | Various                    | D                                          | -        |
| 158 | 352     | 2006             | The role of frontline RNS in the selection of an electronic medical record business partner                                                                        | Computers Informatics Nursing                                                               | 2               | 2           | Hospital/IDS             |          |              |          |          |        | Case Study                                       | Tennessee    | Various                    | E                                          | 6        |
| 159 | 353     | 2006             | Use of computerized medical records in home health and hospice agencies: United States, 2000                                                                       | Vital and health statistics. Series 13, Data from the National Health Survey                | 2               | 3           | home and hospice care    |          |              |          |          |        | National US Survey                               | National     | EHR                        | D                                          | 1        |
| 160 | 354     | 2006             | Racial Differences in Attitudes Toward Innovative Medical Technology*                                                                                              | Journal of general internal medicine                                                        | 5               | 3           | IDS (VA)                 |          |              |          |          |        | Survey                                           | Pennsylvania | Medical Implant Technology | D                                          | 1        |
| 161 | 355     | 2006             | Measuring hospital readiness for information technology (IT) innovation: A multisite study of the Organizational Information Technology Innovation Readiness Scale | Journal of Nursing Measurement                                                              | 3               | 3           | hospital                 |          |              |          |          |        | survey tool development                          | California   | CPOE                       | E                                          | 6        |
| 162 | 358     | 2006             | Evolution of health information management and information technology in emergency medicine                                                                        | Emergency Medicine Australasia                                                              | 2               | 3           | ED                       |          |              |          |          |        | Literature Review                                | Various      | Various                    | E                                          | 6        |
| 163 | 359     | 2006             | Health care CIOs: assessing their fit in the organizational hierarchy and their influence on information technology capability                                     | The Health Care Manager                                                                     | 2               | 3           | hospital                 |          |              |          |          |        | survey                                           | Florida      | Various                    | R                                          | 10       |
| 164 | 360     | 2006             | Health care spending and use of information technology in OECD countries                                                                                           | Health Affairs                                                                              | 3               | 1           | National                 |          |              |          |          |        | opinion                                          | Natoinal     | Various                    | E                                          | 6,8      |
| 165 | 361     | 2006             | Effects of implementing computerized practitioner order entry and nursing documentation on nursing workflow in an emergency department                             | Journal of Healthcare Information Management                                                | 2               | 3           | hospital                 |          |              |          |          |        | Survey/time-motion study/pre post implementation | Missouri     | CPOE/Nursing documentation | E                                          | -        |
| 166 | 363     | 2006             | Why innovation in health care is so hard                                                                                                                           | Harvard Business Review                                                                     | 5               | 1           | National                 |          |              |          |          |        | Opinion                                          | National     | Various                    | D                                          | 1        |
| 167 | 364     | 2006             | Building HR capability in health care organizations                                                                                                                | Health Care Management Review                                                               | 4               | 1           |                          |          |              |          |          |        | Opinion                                          | National     | Various                    | E                                          | 8        |
| 168 | 368     | 2006             | Forming design teams to develop healthcare information systems                                                                                                     | Hospital Topics                                                                             | 2               | 3           | hospital                 |          |              |          |          |        | Survey                                           | Unknown      | Various                    | E                                          | -        |
| 169 | 372     | 2006             | A survey of factors affecting clinician acceptance of clinical decision support                                                                                    | BMC Medical Informatics and Decision Making                                                 | 2               | 3           | IDS                      |          |              |          |          |        | Survey                                           | oregon       | CDSS                       | D                                          | -        |
| 170 | 373     | 2006             | Personal health records: definitions, benefits, and strategies for overcoming barriers to adoption                                                                 | Journal of the American Medical Informatics Association                                     | 3               | 1           | national                 |          |              |          |          |        | opinion                                          | national     | personal health records    | E                                          | 6        |
| 171 | 374     | 2006             | Health information technology and quality improvement for community health centers                                                                                 | Health Affairs                                                                              | 3               | 1           | Community health Centers |          |              |          |          |        | Opinion                                          | National     | EHR                        | R                                          | 9        |
| 172 | 376     | 2006             | Wired for success                                                                                                                                                  | Healthcare financial management: journal of the Healthcare Financial Management Association | 3               | 1           | hospital                 |          |              |          |          |        | opinion                                          | varous       | various                    | E,R                                        | 10       |

Appendix B – Coded List of Identified Data Sources

| No. | Data ID | Publication Year | Title                                                                                                                                                                           | Journal                                                 | Relevance (0-5) | Rigor (0-5) | Industry/Setting   | Patients | Practitioner | Hospital | National | Vendor | Design                                             | Location                | Technology         | Punctuated Equilibrium Component (D, E, R) | Theme(s) |
|-----|---------|------------------|---------------------------------------------------------------------------------------------------------------------------------------------------------------------------------|---------------------------------------------------------|-----------------|-------------|--------------------|----------|--------------|----------|----------|--------|----------------------------------------------------|-------------------------|--------------------|--------------------------------------------|----------|
| 173 | 377     | 2006             | Technology. Finding funding                                                                                                                                                     | Hospitals & Health Networks                             | 3               | 0           | Rural hospitals    |          |              |          |          |        | Opinion                                            | Rural                   | various            | D                                          | 4        |
| 174 | 378     | 2006             | Factors influencing success and failure of health informatics systems--a pilot Delphi study                                                                                     | Methods of information in medicine                      | 3               | 4           | Various            |          |              |          |          |        | Delphi                                             | National                | various            | E                                          | 6        |
| 175 | 382     | 2006             | Health information systems: Failure, success and improvisation                                                                                                                  | International Journal of Medical Informatics            | 4               | 1           |                    |          |              |          |          |        | Opinion                                            | national                | various            | D                                          | -        |
| 176 | 383     | 2006             | Essential prerequisites to the safe and effective widespread roll-out of e-working in healthcare                                                                                | International Journal of Medical Informatics            | 5               | 1           |                    |          |              |          |          |        | opinion                                            | national                | various            | D,E,R                                      | 2,6,7,10 |
| 177 | 385     | 2006             | Assessing the level of healthcare information technology adoption in the United States: a snapshot                                                                              | BMC Medical Informatics and Decision Making             | 5               | 4           | various            |          |              |          |          |        | Qualitative - expert and representative interviews | massachusetts, Colorado | various            | D                                          | 4        |
| 178 | 386     | 2006             | Technology solutions for better outcomes: integrated information management in key to productivity increases in medicine                                                        | British journal of radiology                            | 2               | 1           |                    |          |              |          |          |        | Opinion                                            | National                | Various            | R                                          | 9        |
| 179 | 388     | 2006             | Predicting the adoption of electronic health records by physicians: When will health care be paperless?                                                                         | Journal of the American Medical Informatics Association | 5               | 3           | small practices    |          |              |          |          |        | Obsrevational                                      | National                | EHR                | D,R                                        | 1,5,9    |
| 180 | 389     | 2005             | Is the federal government serious about health IT?                                                                                                                              | Healthcare Financial Management                         | 4               | 1           |                    |          |              |          |          |        | Opinion                                            | national                | various            | D                                          | 3        |
| 181 | 390     | 2006             | Preventing medication errors in hospitals through a systems approach and technological innovation: a prescription for 2010                                                      | Hospital Topics                                         | 3               | 1           |                    |          |              |          |          |        | Opinion                                            | natoinal                | CPOE               | R                                          | -        |
| 182 | 391     | 2006             | Computerized provider order entry and patient safety                                                                                                                            | Pediatric Clinics of North America                      | 2               | 1           | hospital           |          |              |          |          |        | Opinion                                            | Unknown                 | CPOE               | D,E                                        | 4,8      |
| 183 | 393     | 2006             | Design and implementation of an application and associated services to support interdisciplinary medication reconciliation efforts at an integrated healthcare delivery network | Journal of the American Medical Informatics Association | 2               | 2           | Large metro IDS    |          |              |          |          |        | Case Study                                         | Massachusetts           | Med Reconciliation | E,R                                        | 10       |
| 184 | 400     | 2006             | Community hospital successfully implements eRecord and CPOE                                                                                                                     | Computers Informatics Nursing                           | 3               | 2           | community hospital |          |              |          |          |        | Case Study                                         | Pennsylvania            | EHR/CPOE           | D                                          | 5        |
| 185 | 401     | 2006             | The need for organizational change in patient safety initiatives                                                                                                                | International Journal of Medical Informatics            | 4               | 3           | hospital           |          |              |          |          |        | Case Study                                         | pennsylvania            | Error reporting    | D                                          | 5        |
| 186 | 402     | 2006             | Creating technology-enhanced practice: A university home care-corporate alliance                                                                                                | Nursing Faculty Research and Publications               | 3               | 2           | home Care          |          |              |          |          |        | Case Study                                         | Wisconsin               | eHealth            | E                                          | 8        |
| 187 | 406     | 2006             | The Western New York regional electronic health record initiative: healthcare informatics use from the registered nurse perspective                                             | Studies in health technology and informatics            | 2               | 2           | hospital           |          |              |          |          |        | Mixed/Case Study                                   | new York                | EHR                | E                                          | 6        |
| 188 | 409     | 2006             | How common are electronic health records in the United States? A summary of the evidence                                                                                        | Health Affairs                                          | 4               | 4           | Physicians         |          |              |          |          |        | systematic review                                  | national                | EHR                | D                                          | 1        |
| 189 | 410     | 2006             | Clinical information technology gaps persist among physicians                                                                                                                   | Issue brief (Center for Studying Health System Change)  | 3               | 3           | physicians         |          |              |          |          |        | Survey                                             | National Survey         | Various            | D                                          | 1        |
| 190 | 413     | 2006             | Effect of the implementation of an enterprise-wide Electronic Health Record on productivity in the Veterans Health Administration                                               | Health Economics, Policy and Law                        | 4               | 1           | IDS (VA)           |          |              |          |          |        | Opinion                                            | National                | EHR                | D,R                                        | 1,10     |
| 191 | 419     | 2006             | Costs and benefits of health information technology                                                                                                                             | Unknown                                                 | 5               | 4           | national Setting   |          |              |          |          |        | Systematic Review with Expert Opinion              | National                | Various            | E                                          | 6        |
| 192 | 421     | 2006             | Valuing hospital investment in information technology: Does governance make a difference?                                                                                       | Health Care Financing Review                            | 1               | 3           | hospital           |          |              |          |          |        | Observational                                      | national                | Various            | D                                          | 1        |
| 193 | 422     | 2006             | The role of e-health in the changing health care environment                                                                                                                    | Nursing Economics                                       | 2               | 1           |                    |          |              |          |          |        | opinion                                            | national                | ehealth            | D                                          | -        |
| 194 | 425     | 2006             | Impact of barcode medication administration technology on how nurses spend their time on clinical care                                                                          | AMIA 2006 Annual Symposium Proceedings                  | 1               | 3           | IDS                |          |              |          |          |        | Observations/time Study                            | Massachusetts           | Bar Code           | E                                          | -        |
| 195 | 426     | 2006             | Top barriers and facilitators to nurses' PDA adoption                                                                                                                           | AMIA 2006 Annual Symposium Proceedings                  | 1               | 3           | hospital           |          |              |          |          |        | Survey                                             | Maryland                | PDA                | R                                          | 10       |
| 196 | 427     | 2006             | EMR competency: supporting quality, safe and effective care                                                                                                                     | AMIA 2006 Annual Symposium Proceedings                  | 1               | 2           | IDS                |          |              |          |          |        | Case Study                                         | Minnesota               | EHR                | E                                          | 6        |

Appendix B – Coded List of Identified Data Sources

| No. | Data ID | Publication Year | Title                                                                                                               | Journal                                                                                     | Relevance (0-5) | Rigor (0-5) | Industry/Setting      | Patients | Practitioner | Hospital | National | Vendor | Design                  | Location  | Technology          | Punctuated Equilibrium Component (D, E, R) | Theme(s) |   |
|-----|---------|------------------|---------------------------------------------------------------------------------------------------------------------|---------------------------------------------------------------------------------------------|-----------------|-------------|-----------------------|----------|--------------|----------|----------|--------|-------------------------|-----------|---------------------|--------------------------------------------|----------|---|
| 197 | 428     | 2006             | Applying direct observation to model workflow and assess adoption                                                   | AMIA 2006 Annual Symposium Proceedings                                                      | 2               | 2           | IDS                   |          |              | ●        | ●        |        | Case Study              | Tennessee | EHR                 | E                                          | 6        |   |
| 198 | 429     | 2006             | Using IT To Improve Quality at NewYork-Presbyterian Hospital: A Requirements-Driven Strategic Planning Process      | AMIA 2006 Annual Symposium Proceedings                                                      | 2               | 2           | IDS                   |          |              |          | ●        |        | case study              | New york  | Various             | R                                          | 10       |   |
| 199 | 430     | 2006             | Informatics implementation in the Veterans Health Administration (VHA) healthcare system to improve quality of care | AMIA 2006 Annual Symposium Proceedings                                                      | 3               | 3           | IDS (VA)              |          |              |          | ●        |        | Survey                  | national  | Various             | D                                          | 1        |   |
| 200 | 431     | 2006             | Clinical information system availability and use in urban and rural hospitals                                       | Journal of Medical Systems                                                                  | 3               | 3           | hospital              |          |              |          | ●        |        | Survey                  | Iowa      | Various             | D                                          | 1        |   |
| 201 | 435     | 2006             | Considerations in change management related to technology                                                           | Academic Psychiatry                                                                         | 3               | 1           |                       |          |              |          | ●        |        | Opinion                 |           | Various             | R                                          | 10       |   |
| 202 | 436     | 2007             | Clinical information systems in nursing homes: an evaluation of initial implementation strategies                   | Computers Informatics Nursing                                                               | 2               | 2           | nursing home          |          |              |          | ●        |        | Case Study              | Midwest   | Portable technology | E,R                                        | 6,10     |   |
| 203 | 438     | 2007             | Adoption of order entry with decision support for chronic care by physician organizations                           | Journal of the American Medical Informatics Association                                     | 3               | 3           | physician             |          |              | ●        |          |        | Survey                  | national  | CPOE, CDSS          | R                                          | 10       |   |
| 204 | 439     | 2007             | The extent and importance of unintended consequences related to computerized provider order entry                   | Journal of the American Medical Informatics Association                                     | 3               | 3           | hospital              |          |              |          | ●        |        | Survey                  | National  | CPOE                | E                                          | 8        |   |
| 205 | 440     | 2007             | Development and psychometric evaluation of the Impact of Health Information Technology (I-HIT) scale                | Journal of the American Medical Informatics Association                                     | 3               | 3           |                       |          |              | ●        |          |        | Survey/tool Development | national  | Various             | E                                          | 6        |   |
| 206 | 441     | 2007             | Enhancing existing products with new technologies                                                                   | Medical device technology                                                                   | 2               | 1           |                       |          |              |          |          |        | Opinion                 | Unknown   | Various             | E                                          | -        |   |
| 207 | 442     | 2007             | Measuring and monitoring IT using a balanced scorecard approach                                                     | Journal of healthcare information management: JHIM                                          | 2               | 2           |                       |          |              |          | ●        |        | Case Study              | Missouri  | Various             | E                                          | 8        |   |
| 208 | 444     | 2007             | Incremental approach is best with a new EDIS                                                                        | ED Management                                                                               | 2               | 0           |                       |          |              |          | ●        |        | News Article            | Texas     | ED                  | E                                          | 6        |   |
| 209 | 449     | 2007             | Toward an effective strategy for the diffusion and use of clinical information systems                              | Journal of the American Medical Informatics Association                                     | 4               | 1           |                       |          |              | ●        | ●        | ●      | opinion                 | National  | Various             | D,E                                        | 1,8      |   |
| 210 | 450     | 2007             | Health care technology adoption and diffusion in a social context                                                   | Policy, Politics, & Nursing Practice                                                        | 5               | 1           |                       | ●        |              |          |          | ●      | opinion/conceptual      |           | Various             | E,R                                        | 7,9      |   |
| 211 | 454     | 2007             | The impact of converting to an electronic health record on organizational culture and quality improvement           | International Journal of Medical Informatics                                                | 4               | 3           | IDS                   |          |              |          | ●        |        | Survey                  | Illinois  | EHR                 | D,R                                        | 2,9      |   |
| 212 | 456     | 2007             | The effect of payer mix on the adoption of information technologies by hospitals                                    | Health Care Management Review                                                               | 3               | 3           | hospital              |          |              |          |          |        | Survey                  | Florida   | Various             | D                                          | 1        |   |
| 213 | 457     | 2007             | The Relationship Between Pediatric Volume and Information Technology Adoption in Hospitals                          | Quality Management in Healthcare                                                            | 3               | 3           | hospital              |          |              |          | ●        |        | Survey                  | Florida   | Various             | D                                          | 1        |   |
| 214 | 458     | 2007             | Electronic Medical Records for the Orthopaedic Practice                                                             | Clinical orthopaedics and related research                                                  | 2               | 1           | Practitioner          |          |              | ●        |          |        | Opinion                 | Various   | EHR                 | E                                          | -        |   |
| 215 | 459     | 2007             | Five constants of information technology adoption in healthcare                                                     | Hospital Topics                                                                             | 2               | 1           |                       |          |              |          | ●        |        | Opinion                 |           | Various             | E                                          | 6        |   |
| 216 | 461     | 2007             | The case for e-prescribing                                                                                          | Hospitals & health networks/AHA                                                             | 1               | 1           | hospital              |          |              |          |          |        | Opinion                 | national  | eRx                 | E                                          | 6        |   |
| 217 | 462     | 2007             | Stark redo. Hospitals hesitate to help digitize doctors' offices until the relaxed rules are further clarified      | Hospitals & health networks/AHA                                                             | 4               | 1           | hospital              |          |              | ●        | ●        | ●      | ●                       | Opinion   | National            | EHR                                        | D        | 3 |
| 218 | 463     | 2007             | Making the case for a clinical information system: the chief information officer view                               | Journal of critical care                                                                    | 4               | 1           | National              | ●        | ●            | ●        | ●        |        | Opinion                 | National  | Various             | D                                          | 4        |   |
| 219 | 465     | 2007             | Health Information Technology: Does It Facilitate Or Hinder Rapid Learning?                                         | Health Affairs                                                                              | 2               | 1           |                       |          |              |          |          | ●      | Opinion                 |           | Various             | E                                          | 6        |   |
| 220 | 466     | 2007             | Implementation and use of an electronic health record within the Indian Health Service                              | Journal of the American Medical Informatics Association                                     | 3               | 3           | Indian health service |          |              | ●        |          |        | IDS                     | National  | EHR                 | D,E                                        | 1,6      |   |
| 221 | 468     | 2007             | Measuring IT benefits: let us count the ways                                                                        | Healthcare financial management: journal of the Healthcare Financial Management Association | 1               | 1           | hospital              |          |              |          | ●        |        | Opinion                 |           | Various             | E,R                                        | 8,10     |   |
| 222 | 469     | 2007             | Implementation of an obstetrics EMR module: overcoming user dissatisfaction                                         | Journal of Healthcare Information Management                                                | 2               | 1           | OB/GYN                |          |              | ●        |          |        | Case Study              | Michigan  | OB EMR              | E                                          | 6        |   |



Appendix B – Coded List of Identified Data Sources

| No. | Data ID | Publication Year | Title                                                                                                                                                | Journal                                                                    | Relevance (0-5) | Rigor (0-5) | Industry/Setting    | Patients | Practitioner | Hospital | National | Vendor | Design                     | Location   | Technology         | Punctuated Equilibrium Component (D, E, R) | Theme(s) |
|-----|---------|------------------|------------------------------------------------------------------------------------------------------------------------------------------------------|----------------------------------------------------------------------------|-----------------|-------------|---------------------|----------|--------------|----------|----------|--------|----------------------------|------------|--------------------|--------------------------------------------|----------|
| 223 | 470     | 2007             | Showing "what right looks like"--how to improve performance through a paradigm shift around implementation thinking                                  | Journal of Healthcare Information Management                               | 3               | 2           | IDS                 |          |              |          |          |        | Case Study                 | Delaware   | various            | R                                          | 10       |
| 224 | 471     | 2007             | Quality and efficiency successes leveraging IT and new processes                                                                                     | Journal of Healthcare Information Management, Aivol                        | 1               | 2           | hospital            |          |              |          |          |        | case study                 | Various    | Various            | E                                          | -        |
| 225 | 473     | 2007             | Regional Health Information Organizations: A Vehicle for Transforming Health Care Delivery?                                                          | Journal of Medical Systems                                                 | 5               | 3           | Nealth System       |          |              |          |          |        | comparative Case Study     | MA, IN, CA | HIE                | D,R                                        | 5,9      |
| 226 | 474     | 2007             | Planning for pharmacy health information technology in critical access hospitals                                                                     | American journal of health-system pharmacy                                 | 2               | 2           | hospital            |          |              |          |          |        | Case Study                 | Florida    | Pharmacy           | E                                          | 6        |
| 227 | 476     | 2007             | The value of electronic health records in community health centers: policy implications                                                              | Health Affairs                                                             | 4               | 3           | health centers      |          |              |          |          |        | comparative case study     | natoinal   | EHR                | E,R                                        | 6,8,9    |
| 228 | 477     | 2007             | A systems approach to purchasing and implementing new technology                                                                                     | Nursing Administration Quarterly                                           | 1               | 1           |                     |          |              |          |          |        | Opinion                    |            | Various            | E                                          | -        |
| 229 | 481     | 2007             | Clinician use of enabling technology: creating a new healthcare system through the use of enabling technologies requires changes on a profound scale | Journal of healthcare information management: JHIM                         | 3               | 1           |                     |          |              |          |          |        | Opinion                    | Natoinal   | Various            | R                                          | 10       |
| 230 | 482     | 2007             | Enterprise project management is key to success: addressing the people, process and technology dimensions of healthcare                              | Journal of healthcare information management: JHIM                         | 2               | 1           |                     |          |              |          |          |        | Opinion                    | National   | Various            | E                                          | -        |
| 231 | 483     | 2007             | EMRs in the Fourth Stage                                                                                                                             | Journal of Healthcare Information Management                               | 2               | 2           | health system       |          |              |          |          |        | Case Study                 | Utah       | EHR                | E                                          | -        |
| 232 | 484     | 2007             | Determinants of personal health record use: a large population study at Cleveland Clinic                                                             | Journal of healthcare information management: JHIM                         | 4               | 4           | hospital            |          |              |          |          |        | Observational with control | Ohio       | PHR                | R                                          | 9        |
| 233 | 485     | 2007             | Digital transformation in home care. A case study                                                                                                    | Journal of healthcare information management: JHIM                         | 2               | 2           | Community Health    |          |              |          |          |        | Case Study                 | New Jersey | EHR                | E                                          | 6        |
| 234 | 486     | 2007             | Redesigning care delivery through health IT implementation. Exploring Trinity Health's IT model                                                      | Journal of Healthcare Information Management                               | 3               | 2           | IDS - health system |          |              |          |          |        | Case Study                 | Iowa       | Various            | R                                          | 10       |
| 235 | 487     | 2007             | Economic Externalities of Health Information Technology                                                                                              | Journal of Healthcare Information Management                               | 3               | 3           |                     |          |              |          |          |        | Theoretical Model          |            | EHR                | D                                          | 2        |
| 236 | 493     | 2007             | Optimizing the acceptance of medication-based alerts by physicians during CPOE implementation in a community hospital environment                    |                                                                            | 2               | 2           | Hospital            |          |              |          |          |        | Case Study                 | California | CPOE               | E                                          | -        |
| 237 | 494     | 2007             | Recommendations for clinical decision support deployment: synthesis of a roundtable of medical directors of information systems                      |                                                                            | 3               | 2           | hospital            |          |              |          |          |        | Focus Group                |            | CDSS               | D                                          | 1        |
| 238 | 497     | 2007             | Hospital adoption of information technologies and improved patient safety: a study of 98 hospitals in Florida                                        | Journal of healthcare management/American College of Healthcare Executives | 3               | 3           | hospital            |          |              |          |          |        | Survey                     | Florida    | Various            | E                                          | 6        |
| 239 | 498     | 2007             | Transformational change in health care systems: an organizational model                                                                              | Health Care Management Review                                              | 5               | 3           | hospital            |          |              |          |          |        | Comparative Case Study     | National   | Various            | R                                          | 10       |
| 240 | 499     | 2007             | Technology acceptance among physicians                                                                                                               | Medical Care Research and Review                                           | 5               | 4           |                     |          |              |          |          |        | Systematic Review          |            | Various            | D,E                                        | 5,6      |
| 241 | 500     | 2007             | Exploring physician adoption of EMRs: a multi-case analysis                                                                                          | Journal of Medical Systems                                                 | 3               | 3           | Small practice      |          |              |          |          |        | Comparative Case Study     | Unknown    | EHR                | D,E                                        | 1,6      |
| 242 | 501     | 2007             | Streamlining Workflow Using Existing Technology                                                                                                      | Computers Informatics Nursing                                              | 2               | 2           | Hospital            |          |              |          |          |        | Case Study                 | Unknown    | Various            | E                                          | -        |
| 243 | 502     | 2007             | Patients meet technology: The newest in patient-centered care initiatives                                                                            | The Health Care Manager                                                    | 1               | 1           |                     |          |              |          |          |        | Opinion                    |            | Patient Technology | D                                          | -        |
| 244 | 504     | 2007             | Technologies of health policy                                                                                                                        | Health Affairs                                                             | 3               | 1           |                     |          |              |          |          |        | Opinion                    |            | Various            | R                                          | 10       |
| 245 | 507     | 2007             | Don't LOL at virtual visits. Technology is allowing more doctors and patients to consult via e-mail, and insurance companies are reimbursing for it  | Modern Healthcare                                                          | 2               | 1           |                     |          |              |          |          |        | Opinion                    |            | eVisits            | D                                          | 3        |
| 246 | 509     | 2007             | Decision support technology in knowledge translation                                                                                                 | Academic Emergency Medicine                                                | 3               | 1           |                     |          |              |          |          |        | Opinion                    |            | CDSS and CPOE      | E                                          | 6        |
| 247 | 512     | 2007             | Designing and evaluating healthcare ICT Innovation: A cognitive engineering view                                                                     | Studies in health technology and informatics                               | 3               | 1           |                     |          |              |          |          |        | Opinion                    |            | Various            | D                                          | -        |
| 248 | 513     | 2007             | Costs of implementing a computerized prescription system in a public mental health agency                                                            | Psychiatric Services                                                       | 2               | 2           | Phychiatric Clinic  |          |              |          |          |        | Case Study                 | Unknown    | Eprescribing       | E                                          | 6        |

Appendix B – Coded List of Identified Data Sources

| No. | Data ID | Publication Year | Title                                                                                                                              | Journal                                                                                                 | Relevance (0-5) | Rigor (0-5) | Industry/Setting           | Patients | Practitioner | Hospital | National | Vendor | Design                   | Location             | Technology        | Punctuated Equilibrium Component (D, E, R) | Theme(s) |
|-----|---------|------------------|------------------------------------------------------------------------------------------------------------------------------------|---------------------------------------------------------------------------------------------------------|-----------------|-------------|----------------------------|----------|--------------|----------|----------|--------|--------------------------|----------------------|-------------------|--------------------------------------------|----------|
| 249 | 517     | 2007             | Computerized physician order entry with clinical decision support in long-term care facilities: costs and benefits to stakeholders | Journal of the American Geriatrics Society                                                              | 3               | 1           | LTC                        |          |              |          |          |        | Opinion                  |                      | CPOE CDS          | D,E,R                                      | 4,6,10   |
| 250 | 518     | 2007             | The politics of information technology                                                                                             | Nursing Administration Quarterly                                                                        | 2               | 1           | Hospital                   |          |              |          |          |        | Opinion                  |                      | Various           | E                                          | 6        |
| 251 | 520     | 2007             | Organizational technologies for transforming care: measures and strategies for pursuit of IOM quality aims                         | The Journal of ambulatory care management                                                               | 2               | 1           |                            |          |              |          |          |        | Opinion                  |                      | Various           | D,R                                        | 2,9      |
| 252 | 521     | 2007             | Adoption of health information technology in community health centers: results of a national survey                                | Health Affairs                                                                                          | 4               | 3           | Health centers             |          |              |          |          |        | Cross Sectional          | National             | EHR               | D                                          | 1        |
| 253 | 522     | 2007             | Health information exchange: 'lex parsimoniae'                                                                                     | Health Affairs                                                                                          | 4               | 1           |                            |          |              |          |          |        | Opinion                  | National             | Various           | D                                          | 1        |
| 254 | 524     | 2007             | Unintended consequences of information technologies in health care--an interactive sociotechnical analysis                         | Journal of the American Medical Informatics Association                                                 | 4               | 1           | hospital                   |          |              |          |          |        | Opinion/theoretical      |                      | Various           | D                                          | 5        |
| 255 | 527     | 2007             | Telemedicine's Adolescent Angst                                                                                                    | Hospitals & Health Networks                                                                             | 2               | 1           |                            |          |              |          |          |        | opinion                  |                      | Telemedicine      | D                                          | 4        |
| 256 | 529     | 2007             | Ten lessons from the top 100                                                                                                       | Hosp Health Netw                                                                                        | 1               | 3           |                            |          |              |          |          |        | Cross Sectional          | National             | Various           | E                                          | -        |
| 257 | 606     | 2008             | A mandate in Mass. Massachusetts wants CPOE in place by 2012. Will CIOs be willing and able to comply?                             | Healthcare informatics: the business magazine for information and communication systems                 | 3               | 0           | hospital                   |          |              |          |          |        | news                     | Massachusetts        | CPOE/EHR          | D                                          | 3        |
| 258 | 611     | 2008             | The future of healthcare IT: what can we expect to see?                                                                            | Healthcare financial management: journal of the Healthcare Financial Management Association             | 3               | 0           |                            |          |              |          |          |        | news                     |                      | Various           | R                                          | 10       |
| 259 | 612     | 2008             | Transforming mental health and substance abuse data systems in the United States                                                   | Psychiatric Services                                                                                    | 3               | 1           | Phychatric substance abuse |          |              |          |          |        | Opinion                  |                      | EHR               | D                                          | 3        |
| 260 | 615     | 2008             | The promise of simultaneous transformation of practice and research with the use of clinical information systems                   | Nursing Outlook                                                                                         | 3               | 1           | Nursing                    |          |              |          |          |        | Opinion                  | National             | Various           | D                                          | -        |
| 261 | 617     | 2008             | Factors influencing physician use of clinical electronic information technologies after adoption by their medical group practices  | Health Care Management Review                                                                           | 3               | 2           | group practice             |          |              |          |          |        | cross sectional / survey | No specified         | eRx               | D                                          | 1        |
| 262 | 618     | 2008             | Information technology from novice to expert: implementation implications                                                          | Journal of nursing management                                                                           | 2               | 1           | Nursing                    |          |              |          |          |        | Opinion                  |                      | CDSS              | E                                          | 6        |
| 263 | 619     | 2008             | Adoption of anesthesia information management systems by academic departments in the United States                                 | Anesthesia & Analgesia                                                                                  | 2               | 3           | hospital                   |          |              |          |          |        | Cross Sectional / Survey | National             | Anesthesia System | E                                          | 6,8      |
| 264 | 622     | 2008             | Change readiness assessment for conversion to electronic medical records                                                           | Journal of nursing administration                                                                       | 2               | 2           | hospital                   |          |              |          |          |        | case study               | tennessee            | Various           | R                                          | 10       |
| 265 | 623     | 2008             | A descriptive analysis of a nursing home clinical information system with decision support                                         | Perspectives in Health Information Management/AHIMA, American Health Information Management Association | 2               | 2           | nursing home               |          |              |          |          |        | case study               | Missouri             | CDSS              | R                                          | 10       |
| 266 | 624     | 2008             | Continuous innovation in health care: implications of the Geisinger experience                                                     | Health Affairs                                                                                          | 4               | 2           | IDS                        |          |              |          |          |        | Case Study               | Pennsylvania         | Various           | E,R                                        | 8,9      |
| 267 | 625     | 2008             | Health information technology: Strategic initiatives, real progress                                                                | Health Affairs                                                                                          | 2               | 1           |                            |          |              |          |          |        | Opinion                  |                      | EHR               | R                                          | 9        |
| 268 | 627     | 2008             | Merging home and health via contemporary care delivery: Program management insights on a home telehealth project                   | Computers Informatics Nursing                                                                           | 2               | 2           | VA                         |          |              |          |          |        | Case Study               | National             | TeleHealth        | R                                          | 10       |
| 269 | 628     | 2008             | Adoption and perceptions of electronic health record systems by ophthalmologists: an American Academy of Ophthalmology survey      | Ophthalmology                                                                                           | 3               | 3           | Small practice             |          |              |          |          |        | Survey/Cross Sectional   | National             | EHR               | E                                          | 6        |
| 270 | 631     | 2008             | Clinical microsystems, part 2. Learning from micro practices about providing patients the care they want and need                  | Joint Commission Journal on Quality and Patient Safety                                                  | 4               | 1           |                            |          |              |          |          |        | Opinion                  |                      | Various           | R                                          | 9        |
| 271 | 633     | 2008             | Seeking perfection in health care                                                                                                  | Healthcare executive                                                                                    | 4               | 2           | Hospital                   |          |              |          |          |        | Case Study               | Wasshinton (Seattle) | change Management | E                                          | 1        |

Appendix B – Coded List of Identified Data Sources

| No. | Data ID | Publication Year | Title                                                                                                                                                       | Journal                                                                                                 | Relevance (0-5) | Rigor (0-5) | Industry/Setting | Patients | Practitioner | Hospital | National | Vendor | Design                             | Location      | Technology   | Punctuated Equilibrium Component (D, E, R) | Theme(s) |
|-----|---------|------------------|-------------------------------------------------------------------------------------------------------------------------------------------------------------|---------------------------------------------------------------------------------------------------------|-----------------|-------------|------------------|----------|--------------|----------|----------|--------|------------------------------------|---------------|--------------|--------------------------------------------|----------|
| 272 | 634     | 2008             | HHS shifts IT into high gear. New plan to promote information technology released to mostly good reviews, but concerns remain about its scope and funding   | Modern Healthcare                                                                                       | 2               | 0           |                  |          |              |          |          |        | News Story                         |               | Various      | R                                          | 9        |
| 273 | 635     | 2008             | How technology solutions can impact nursing retention                                                                                                       | Nursing economic\$                                                                                      | 1               | 0           | Hospital         |          |              |          |          |        | News/Opinion                       |               | Various      | E                                          | -        |
| 274 | 636     | 2008             | Great project management= IT success                                                                                                                        | Physician Executive                                                                                     | 1               | 0           |                  |          |              |          |          |        | News/Opinion                       |               | Various      | R                                          | 10       |
| 275 | 638     | 2008             | Enhance your technology and enrich your bottom line                                                                                                         | MGMA connexion/Medical group Management Association                                                     | 1               | 0           |                  |          |              |          |          |        | News/Opinion                       |               | Various      | E                                          | 6        |
| 276 | 639     | 2008             | Making it to the EHR promised land. How to solve common EHR adoption problems                                                                               | MGMA connexion/Medical group Management Association                                                     | 1               | 0           |                  |          |              |          |          |        | News/Opinion                       |               | EHR          | R                                          | 10       |
| 277 | 640     | 2008             | The duality of health technology in chronic illness: how designers envision our future                                                                      | Chronic Illness                                                                                         | 3               | 1           |                  |          |              |          |          |        | Opinion                            |               | Telehealth   | E                                          | -        |
| 278 | 643     | 2008             | Market effects on electronic health record adoption by physicians                                                                                           | Health Care Management Review                                                                           | 3               | 3           | Small practice   |          |              |          |          |        | Cross Sectional                    | Florida       | Various      | D                                          | 1        |
| 279 | 644     | 2008             | Predicting computerized physician order entry system adoption in US hospitals: Can the federal mandate be met?                                              | International Journal of Medical Informatics                                                            | 5               | 3           | hospital         |          |              |          |          |        | Theory Development/Cross Sectional | national      | CPOE         | R                                          | 9        |
| 280 | 649     | 2008             | Perceptions regarding electronic health record implementation among health information management professionals in Alabama: a statewide survey and analysis | Perspectives in Health Information Management/AHIMA, American Health Information Management Association | 3               | 3           | hospital         |          |              |          |          |        | cross sectional/survey             | Alabama       | EHR          | E                                          | 6        |
| 281 | 651     | 2008             | Challenges to EHR implementation in electronic-versus paper-based office practices                                                                          | Journal of general internal medicine                                                                    | 3               | 3           | Ambulatory       |          |              |          |          |        | comparative case study             | New York      | EHR          | D                                          | 1        |
| 282 | 653     | 2008             | Adoption of health information technology for medication safety in US hospitals, 2006                                                                       | Health Affairs                                                                                          | 3               | 3           | Hospital         |          |              |          |          |        | Cross Sectional                    | National      | Various      | D                                          | 1        |
| 283 | 655     | 2008             | Crossing the implementation chasm: a proposal for bold action                                                                                               | Journal of the American Medical Informatics Association                                                 | 4               | 1           |                  |          |              |          |          |        | Opinion                            |               | Various      | D                                          | 2,5      |
| 284 | 656     | 2008             | Describing the influence of technologies on registered nurses' work                                                                                         | Clinical Nurse Specialist                                                                               | 3               | 2           | hospital         |          |              |          |          |        | Focus Group                        | Unknown       | Various      | E                                          | 6        |
| 285 | 657     | 2008             | The adoption of hospital information systems                                                                                                                | Health economics                                                                                        | 5               | 3           | Hospital         |          |              |          |          |        | Cross Sectional                    | national      | Various      | D                                          | 1        |
| 286 | 660     | 2008             | Health care information technology in rural America: electronic medical record adoption status in meeting the national agenda                               | The Journal of Rural Health                                                                             | 4               | 1           | Hospital         |          |              |          |          |        | Opinion                            | iowa          | EHR          | D,R                                        | 1,9      |
| 287 | 661     | 2008             | The role of organizational factors in the adoption of healthcare information technology in Florida hospitals                                                | Health Care Management Science                                                                          | 3               | 3           | Hospital         |          |              |          |          |        | Cross Sectional/Survey             | Florida       | Various      | D                                          | 1        |
| 288 | 662     | 2008             | The riches of e-prescribing. Insurers will say, do pretty much anything to get physicians to prescribe medications electronically. Ever wonder why?         | Modern Healthcare                                                                                       | 2               | 0           |                  |          |              |          |          |        | News/Opinion                       |               | ePrescribing | D                                          | 3,4      |
| 289 | 663     | 2008             | Exploring a model-driven architecture (MDA) approach to health care information systems development                                                         | International Journal of Medical Informatics                                                            | 3               | 1           |                  |          |              |          |          |        | Opinion/Exploratory                |               | Various      | D,E                                        | 1,2,6    |
| 290 | 666     | 2008             | Variation in electronic prescribing implementation among twelve ambulatory practices                                                                        | Journal of general internal medicine                                                                    | 3               | 3           | ambulatory       |          |              |          |          |        | Comparative Case Study             | new Jersey    | Eprescribing | E                                          | 6        |
| 291 | 667     | 2008             | Uptake of electronic prescribing in community-based practices                                                                                               | Journal of general internal medicine                                                                    | 3               | 3           | Ambulatory       |          |              |          |          |        | Cross Sectional                    | Massachusetts | eRx          | D                                          | 1        |
| 292 | 669     | 2008             | Implementing computerized physician order management at a community hospital                                                                                | Joint Commission Journal on Quality and Patient Safety                                                  | 3               | 2           | IDS              |          |              |          |          |        | Case Study                         | Ohio          | CPOE         | E,R                                        | 10       |
| 293 | 671     | 2008             | IT at a Crossroads                                                                                                                                          | Hospitals & health networks/AHA                                                                         | 3               | 0           |                  |          |              |          |          |        | News/Opinion                       |               | Various      | E                                          | 6        |
| 294 | 672     | 2008             | A national health IT policy proves elusive                                                                                                                  | Hospitals & Health Networks                                                                             | 3               | 0           |                  |          |              |          |          |        | News/Opinion                       |               | Various      | E,R                                        | 6,9      |
| 295 | 675     | 2008             | Identifying organizational capacities and incentives for clinical data-sharing: the case of a regional perinatal information system                         | Journal of the American Medical Informatics Association                                                 | 3               | 2           | hospital         |          |              |          |          |        | Case Study                         | California    | HIE          | E                                          | 6        |
| 296 | 676     | 2008             | Measuring the benefits of IT-enabled care transformation                                                                                                    | Healthcare financial management: journal of the Healthcare Financial Management Association             | 3               | 2           | Hospital         |          |              |          |          |        | Case Study                         | Arizona       | Various      | R                                          | 10       |

Appendix B – Coded List of Identified Data Sources

| No. | Data ID | Publication Year | Title                                                                                                                                                                                                           | Journal                                                                                     | Relevance (0-5) | Rigor (0-5) | Industry/Setting                       | Patients | Practitioner | Hospital | National | Vendor | Design                 | Location               | Technology   | Punctuated Equilibrium Component (D, E, R) | Theme(s) |
|-----|---------|------------------|-----------------------------------------------------------------------------------------------------------------------------------------------------------------------------------------------------------------|---------------------------------------------------------------------------------------------|-----------------|-------------|----------------------------------------|----------|--------------|----------|----------|--------|------------------------|------------------------|--------------|--------------------------------------------|----------|
| 297 | 677     | 2008             | Payer-provider connectivity progress elusive but possible                                                                                                                                                       | Healthcare financial management: journal of the Healthcare Financial Management Association | 4               | 1           | Insurance                              |          |              |          |          |        | Opinion                | National               | Claims Admin | D,E                                        | 2,8      |
| 298 | 678     | 2008             | Electronic health records: which practices have them, and how are clinicians using them?                                                                                                                        | Journal of Evaluation in Clinical Practice                                                  | 3               | 3           | ambulatory practice                    |          |              |          |          |        | cross sectional survey | Massachusetts          | EHR          | D                                          | 1        |
| 299 | 679     | 2008             | Hospital quality of care: Does information technology matter? The relationship between information technology adoption and quality of care                                                                      | Health Care Management Review                                                               | 4               | 3           | Hospital                               |          |              |          |          |        | Cross Sectional        | Florida                | Various      | D                                          | -        |
| 300 | 681     | 2008             | Early experiences with personal health records                                                                                                                                                                  | Journal of the American Medical Informatics Association                                     | 3               | 3           | Hospital                               |          |              |          |          |        | Comparative Case Study | Massachusetts          | PHR          | D,E                                        | 3,6      |
| 301 | 683     | 2008             | From the ground up: building an all-digital hospital                                                                                                                                                            | Physician Executive                                                                         | 2               | 2           | hospital                               |          |              |          |          |        | Case Study             | Wisconsin              | Various      | R                                          | 10       |
| 302 | 690     | 2008             | Critical Access Hospital Informatics                                                                                                                                                                            | Journal of Healthcare Information Management                                                | 3               | 3           | Hospital                               |          |              |          |          |        | Comparative Case Study | iowa                   | Various      | R                                          | 10       |
| 303 | 694     | 2008             | A qualitative analysis of an electronic health record (EHR) implementation in an academic ambulatory setting                                                                                                    | Informatics in Primary Care                                                                 | 3               | 2           | ambulatory practice                    |          |              |          |          |        | Case Study             | New York               | EHR          | E                                          | 6        |
| 304 | 696     | 2008             | Minimizing hybrid records. Tips for reducing paper documentation as new systems come online                                                                                                                     | Journal of AHIMA/American Health Information Management Association                         | 2               | 0           |                                        |          |              |          |          |        | News                   | Montana                | EHR          | R                                          | 10       |
| 305 | 700     | 2010             | Using technology to prevent adverse drug events in the intensive care unit                                                                                                                                      | Critical care medicine                                                                      | 2               | 1           | hospital                               |          |              |          |          |        | Opinion                | National               | Various      | D                                          | 2        |
| 306 | 701     | 2010             | Baby steps. Lessons learned by leaders of one of the nation's leading children's hospitals on the complexities of IT rollouts in the pediatric setting                                                          | Healthcare informatics: the business magazine for information and communication systems     | 2               | 0           | hospital                               |          |              |          |          |        | News                   | Massachusetts          | Various      | D                                          | 2        |
| 307 | 703     | 2010             | Service-oriented architecture in public health                                                                                                                                                                  | Journal of healthcare information management: JHIM                                          | 2               | 2           | Public Health                          |          |              |          |          |        | Case Study             | New York, Rhode Island | Various      | E                                          | 6        |
| 308 | 704     | 2010             | Physician buy-in for EMRs                                                                                                                                                                                       | Journal of healthcare information management: JHIM                                          | 2               | 1           | Various                                |          |              |          |          |        | Opinion                | national               | Various      | R                                          | 10       |
| 309 | 705     | 2010             | Strategy and governance for successful implementation of an enterprise-wide ambulatory EMR                                                                                                                      | Journal of healthcare information management: JHIM                                          | 2               | 2           | Health System                          |          |              |          |          |        | Case Study             | new York               | EHR          | E,R                                        | 10       |
| 310 | 706     | 2010             | A Health Center Controlled Network's Experience in Ambulatory Care EHR Implementation                                                                                                                           | J Healthc Inf Manag                                                                         | 2               | 2           | community health center                |          |              |          |          |        | case study             | New York               | EHR          | E,R                                        | 10       |
| 311 | 707     | 2010             | An implementation case study. Implementation of the Indian Health Service's Resource and Patient Management System Electronic Health Record in the ambulatory care setting at the Phoenix Indian Medical Center | Journal of healthcare information management: JHIM                                          | 2               | 2           | Medical Center - Indian Health Service |          |              |          |          |        | case study             | Arizona                | EHR          | E,R                                        | 10       |
| 312 | 708     | 2010             | Keys to a successful and sustainable telemedicine program                                                                                                                                                       | International Journal of Technology Assessment in Health Care                               | 2               | 3           | Telemedicine                           |          |              |          |          |        | cross sectional survey | National               | Telehealth   | E                                          | 8        |
| 313 | 709     | 2010             | Transforming medicine via digital innovation                                                                                                                                                                    | Science Translational Medicine                                                              | 3               | 1           | Various                                |          |              |          |          |        | Opinion                | national               | Wireless     | R                                          | -        |
| 314 | 710     | 2010             | Who'll Run Your IT?                                                                                                                                                                                             | Hospitals & Health Networks                                                                 | 4               | 0           | Hospital                               |          |              |          |          |        | Opinion                | national               | Various      | E                                          | 6        |
| 315 | 711     | 2010             | What have we learned about interventions to reduce medical errors?                                                                                                                                              | Annual review of public health                                                              | 2               | 4           | Various                                |          |              |          |          |        | Literature Review      | National               | Various      | E                                          | 6        |
| 316 | 712     | 2010             | Clinical Tech Trends 2010. Trend: HITECH                                                                                                                                                                        | Healthcare informatics: the business magazine for information and communication systems     | 4               | 0           | Hospital                               |          |              |          |          |        | News/Opinion           | National               | Various      | D                                          | 3        |
| 317 | 713     | 2010             | Physicians at the CFO's door: what's your response to requests for new technology?                                                                                                                              | Healthcare financial management: journal of the Healthcare Financial Management Association | 4               | 0           | Hospital                               |          |              |          |          |        | news/Opinion           | National               | Various      | E                                          | 8        |
| 318 | 716     | 2010             | Transforming to a computerized system for nursing care: organizational success within Magnet idealism                                                                                                           | Computers Informatics Nursing                                                               | 2               | 1           | Hospital                               |          |              |          |          |        | Case Study             | Florida                | Various      | D                                          | 1        |
| 319 | 717     | 2010             | Carrots and sticks for EHR implementation                                                                                                                                                                       | Healthcare financial management: journal of the Healthcare Financial Management Association | 3               | 0           | Mixed                                  |          |              |          |          |        | News/Opinion           | national               | EHR          | D,E                                        | 3,8      |

Appendix B – Coded List of Identified Data Sources

| No. | Data ID | Publication Year | Title                                                                                                                                                                                   | Journal                                                                                                 | Relevance (0-5) | Rigor (0-5) | Industry/Setting                         | Patients | Practitioner | Hospital | National | Vendor | Design                 | Location                  | Technology | Punctuated Equilibrium Component (D, E, R) | Theme(s) |
|-----|---------|------------------|-----------------------------------------------------------------------------------------------------------------------------------------------------------------------------------------|---------------------------------------------------------------------------------------------------------|-----------------|-------------|------------------------------------------|----------|--------------|----------|----------|--------|------------------------|---------------------------|------------|--------------------------------------------|----------|
|     |         |                  |                                                                                                                                                                                         |                                                                                                         |                 |             |                                          |          |              |          |          |        |                        |                           |            |                                            |          |
| 320 | 720     | 2010             | Social, organizational, and contextual characteristics of clinical decision support systems for intensive insulin therapy: a literature review and case study                           | International Journal of Medical Informatics                                                            | 3               | 2           | Hospital                                 |          |              |          |          |        | Case Study             | Tennessee                 | CDSS       | E                                          | 6        |
| 321 | 721     | 2010             | Toward the development of national telehealth services: the role of Veterans Health Administration and future directions for research                                                   | TELEMEDICINE and e-HEALTH                                                                               | 3               | 1           | IDS                                      |          |              |          |          |        | Opinion                | National                  | TeleHealth | D                                          | 1        |
| 322 | 722     | 2010             | Can you feel IT coming? Though adoption of anesthesiology information systems is still low, their use is rising, and will continue as ARRA approaches                                   | Healthcare informatics: the business magazine for information and communication systems                 | 3               | 0           | Hospital                                 |          |              |          |          |        | Opinion/News           |                           | anesthesia | D                                          | 2        |
| 323 | 723     | 2010             | The technology acceptance model: its past and its future in health care                                                                                                                 | Journal of biomedical informatics                                                                       | 4               | 4           | Mixed                                    |          |              |          |          |        | Literature Review      |                           | Various    | D                                          | 5        |
| 324 | 725     | 2010             | Funding the unfundable: mechanisms for managing uncertainty in decisions on the introduction of new and innovative technologies into healthcare systems                                 | Pharmacoeconomics                                                                                       | 2               | 4           | Naitonal                                 |          |              |          |          |        | Systematic Review      | National                  | Various    | E                                          | 6        |
| 325 | 726     | 2010             | Medical librarians supporting information systems project lifecycles toward improved patient safety                                                                                     | J Healthc Inf Manag                                                                                     | 3               | 1           | Mixed                                    |          |              |          |          |        | Opinion/News           | National                  | Various    | E,R                                        | 10       |
| 326 | 727     | 2010             | Making music out of noise. The Sentara Healthcare Experience Implementing e-Care                                                                                                        | Journal of healthcare information management: JHIM                                                      | 3               | 2           | hospital                                 |          |              |          |          |        | Case Study             | Virginia - North Carolina | Various    | E,R                                        | 10       |
| 327 | 728     | 2010             | So much to do, so little time. To accomplish the mandatory initiatives of ARRA, healthcare organizations will require significant and thoughtful planning, prioritization and execution | Journal of healthcare information management: JHIM                                                      | 3               | 1           | mixed                                    |          |              |          |          |        | new/Opinion            | National                  | Various    | D                                          | 3        |
| 328 | 729     | 2009             | Assessing HIE stakeholder readiness for consumer access: lessons learned from the NHIN trial implementations                                                                            | Journal of healthcare information management: JHIM                                                      | 3               | 2           | hospital                                 |          |              |          |          |        | Focus Group            | Indiana                   | PHR        | E                                          | 6        |
| 329 | 730     | 2010             | Top EHR challenges in light of the stimulus. Enabling effective interdisciplinary, intradisciplinary and cross setting communication                                                    | Journal of healthcare information management: JHIM                                                      | 3               | 1           | Various                                  |          |              |          |          |        | Opinion                | National                  | Various    | D                                          | 3        |
| 330 | 731     | 2010             | The relationship between physician practice characteristics and physician adoption of electronic health records                                                                         | Health Care Management Review                                                                           | 3               | 3           | outpatient                               |          |              |          |          |        | Cross Sectional Survey | Nebraska and South Dakota | EHR        | D                                          | 5        |
| 331 | 733     | 2010             | Health information technology: fallacies and sober realities                                                                                                                            | Journal of the American Medical Informatics Association                                                 | 5               | 1           | Mixed                                    |          |              |          |          |        | opinion                | national                  | Various    | D                                          | 2        |
| 332 | 734     | 2009             | Keys to engaging clinicians in clinical IT                                                                                                                                              | Healthcare Financial Management                                                                         | 2               | 0           | Hospital                                 |          |              |          |          |        | news                   | NA                        | EHR        | E                                          | 6        |
| 333 | 735     | 2009             | The Evolving Use of a Clinical Data Repository: Facilitating Data Access Within an Electronic Medical Record                                                                            |                                                                                                         | 2               | 2           | Hospital                                 |          |              |          |          |        | Case study             | new York                  | EHR        | E                                          | 6        |
| 334 | 736     | 2009             | Examining the Relationship between Clinical Decision Support and Performance Measurement                                                                                                |                                                                                                         | 3               | 2           | Hospital                                 |          |              |          |          |        | Case Study             | National                  | CDSS       | R                                          | 10       |
| 335 | 737     | 2009             | Health care IT: supporting cost efficiencies in tough times                                                                                                                             | Benefits quarterly                                                                                      | 3               | 0           | Employer Sponsored Health clinic or Plan |          |              |          |          |        | News/Opinion           | National                  | Various    | D                                          | 1        |
| 336 | 738     | 2009             | Factors influencing acceptance of electronic health records in hospitals                                                                                                                | Perspectives in Health Information Management/AHIMA, American Health Information Management Association | 3               | 3           | Hospital                                 |          |              |          |          |        | Cross Sectional Survey | Arkansas                  | EHR        | D                                          | 5        |
| 337 | 739     | 2009             | A framework for predicting EHR adoption attitudes: A physician survey                                                                                                                   | Perspectives in Health Information Management/AHIMA, American Health Information Management Association | 4               | 3           | hospital                                 |          |              |          |          |        | Cross Sectional Survey | Mississippi               | EHR        | D                                          | 1,5      |
| 338 | 741     | 2009             | The integration payoff: 3 examples                                                                                                                                                      | Healthcare financial management: journal of the Healthcare Financial Management Association             | 4               | 2           | hospital                                 |          |              |          |          |        | News/Case Study        | National                  | Various    | D,E                                        | 1,8      |

Appendix B – Coded List of Identified Data Sources

| No. | Data ID | Publication Year | Title                                                                                                                                  | Journal                                                                                     | Relevance (0-5) | Rigor (0-5) | Industry/Setting     | Patients | Practitioner | Hospital | National | Vendor | Design                                    | Location      | Technology         | Punctuated Equilibrium Component (D, E, R) | Theme(s) |
|-----|---------|------------------|----------------------------------------------------------------------------------------------------------------------------------------|---------------------------------------------------------------------------------------------|-----------------|-------------|----------------------|----------|--------------|----------|----------|--------|-------------------------------------------|---------------|--------------------|--------------------------------------------|----------|
| 339 | 742     | 2009             | Tensions and Paradoxes in Electronic Patient Record Research: A Systematic Literature Review Using the Meta-narrative Method           | Milbank Quarterly                                                                           | ● 5             | ● 5         | Various              |          |              | ●        | ●        | ●      | Systematic Review (meta-narrative method) | NA            | EHR                | D,E                                        | 1,2,6    |
| 340 | 743     | 2009             | Information and communications technology in US health care: why is adoption so slow and is slower better?                             | Journal of health politics, policy and law                                                  | ● 5             | ● 1         | National Health      |          |              |          |          | ●      | Opinion                                   | National      | Various            | D                                          | 2        |
| 341 | 744     | 2009             | Electronic health records and the board's connection                                                                                   | Trustee                                                                                     | ● 1             | ○ 0         | Hospital             |          |              |          | ●        |        | news                                      | Unknown       | Various            | E                                          | -        |
| 342 | 746     | 2009             | The sociology of change                                                                                                                | Journal of Medical Practice Management                                                      | ● 4             | ● 1         | Various              |          |              |          | ●        |        | Opinion                                   | National      | EMR                | D                                          | 1        |
| 343 | 748     | 2009             | Practitioner approaches to the integration of clinical decision support system technology in critical care                             | Journal of nursing administration                                                           | ● 3             | ● 2         | Hospital             |          |              |          | ●        |        | Case Study                                | MidWest       | CDSS               | E                                          | 6        |
| 344 | 751     | 2009             | Evidence of an emerging digital divide among hospitals that care for the poor                                                          | Health Affairs                                                                              | ● 3             | ● 3         | Hospital             |          |              |          | ●        |        | Cross Sectional Survey                    | National      | EHR                | D                                          | 1        |
| 345 | 753     | 2009             | Information technology implementation in a rural hospital: a cautionary tale                                                           | Journal of healthcare management/American College of Healthcare Executives                  | ● 2             | ● 2         | hospital             |          |              |          | ●        |        | Case Study                                | Unknown       | Various            | E                                          | 6        |
| 346 | 755     | 2009             | The relationship between local hospital IT capabilities and physician EMR adoption                                                     | Journal of Medical Systems                                                                  | ● 3             | ● 3         | hospital - physician |          | ●            | ●        |          |        | Cross Sectional Survey                    | Florida       | EMR                | D                                          | 3        |
| 347 | 759     | 2009             | Stimulus bill implementation: expanding meaningful use of health IT                                                                    |                                                                                             | ● 4             | ● 1         |                      |          |              |          |          | ●      | Opinion                                   | National      | Various            | D,R                                        | 3,9      |
| 348 | 760     | 2009             | Overcoming barriers to the implementation of a pharmacy bar code scanning system for medication dispensing: a case study               | Journal of the American Medical Informatics Association                                     | ● 3             | ● 2         | Hospital             |          |              |          | ●        |        | Case Study                                | massachusetts | Rx Bar Code        | E                                          | 6        |
| 349 | 761     | 2009             | The clinical decision support consortium                                                                                               | Stud Health Technol Inform                                                                  | ● 3             | ● 1         | Hospital             |          |              |          | ●        |        | Opinion                                   | unknown       | CDSS               | E                                          | 6        |
| 350 | 764     | 2009             | Testing some major determinants for hospital innovation success                                                                        | International Journal of Health Care Quality Assurance                                      | ● 3             | ● 3         | Hospital             |          |              |          | ●        |        | Cross Sectional Survey                    | National      | NA                 | R                                          | 10       |
| 351 | 765     | 2009             | Dilemmas, tetralemmas, reimagining the electronic health record                                                                        | Advances in Nursing Science                                                                 | ● 3             | ● 1         |                      |          |              |          |          |        | Opinion                                   |               | EHR                | E                                          | 6        |
| 352 | 766     | 2009             | GE program could boost EMR adoption                                                                                                    | Healthcare Benchmarks & Quality Improvement                                                 | ● 1             | ○ 0         | Hospital             |          |              |          | ●        |        | news                                      |               |                    | R                                          | -        |
| 353 | 774     | 2009             | Strategies for ensuring an IT project delivers value                                                                                   | Healthcare financial management: journal of the Healthcare Financial Management Association | ● 2             | ● 1         | Hospital             |          |              |          | ●        |        | Opinion                                   | Unknown       | Various            | R                                          | 10       |
| 354 | 776     | 2010             | Strategic, political, and cultural aspects of IT implementation: improving the efficacy of an IT system in a large hospital            | Journal of healthcare management/American College of Healthcare Executives                  | ● 3             | ● 2         | hospital             |          |              |          | ●        |        | Case Study                                | Massachusetts | Patient Management | R                                          | 10       |
| 355 | 777     | 2009             | Does it compute?                                                                                                                       | Modern Healthcare                                                                           | ● 1             | ○ 0         |                      |          |              |          | ●        |        | news                                      |               | Various            | R                                          | 10       |
| 356 | 778     | 2009             | A proclamation for change: transforming the hospital patient care environment                                                          | Journal of nursing administration                                                           | ● 2             | ● 1         |                      |          | ●            |          |          |        | Opinion                                   | National      | Various            | R                                          | 10       |
| 357 | 779     | 2009             | Imminent adopters of electronic health records in ambulatory care                                                                      | Informatics in Primary Care                                                                 | ● 3             | ● 3         | physician            |          |              |          |          |        | Cross Sectional Survey                    | Massachusetts | EHR                | D                                          | 1        |
| 358 | 786     | 2009             | Resistance is futile: but it is slowing the pace of EHR adoption nonetheless                                                           | Journal of the American Medical Informatics Association                                     | ● 5             | ● 3         | Physicians           |          | ●            |          |          |        | Model Development / Cross Sectional       | national      | EHR                | D                                          | 1,5      |
| 359 | 787     | 2009             | Improving doctor-patient communication: examining innovative modalities vis-a-vis effective patient-centric care management technology | Journal of Medical Systems                                                                  | ● 2             | ● 1         | Physician            | ●        | ●            |          |          |        | Opinion                                   | Unknown       | Various            | R                                          | 9        |
| 360 | 788     | 2009             | Implementing a Pharmacy System: Facilitators and Barriers                                                                              | Journal of Medical Systems                                                                  | ● 2             | ● 2         | Hospital             |          |              |          | ●        |        | Case Study                                | Georgia       | CPOE               | E                                          | 6        |
| 361 | 792     | 2009             | Implementation of an Electronic Documentation System Using Microsystem and Quality Improvement Concepts                                | Advances in Neonatal Care                                                                   | ● 3             | ● 2         | Hospital             |          |              |          | ●        |        | Case Study                                | Michigan      | EMR                | E,R                                        | 10       |
| 362 | 793     | 2009             | A competitive edge. Whether for profit or not, CIOs are under pressure to make sure every IT dollar yields concrete benefits           | Healthcare informatics: the business magazine for information and communication systems     | ● 2             | ● 1         | Hospital             |          |              |          | ●        |        | News                                      | National      | Various            | D,E                                        | 1,8      |

Appendix B – Coded List of Identified Data Sources

| No. | Data ID | Publication Year | Title                                                                                                                                   | Journal                                                                                                     | Relevance (0-5) | Rigor (0-5) | Industry/Setting           | Patients | Practitioner | Hospital | National | Vendor | Design                           | Location      | Technology                | Punctuated Equilibrium Component (D, E, R) | Theme(s) |
|-----|---------|------------------|-----------------------------------------------------------------------------------------------------------------------------------------|-------------------------------------------------------------------------------------------------------------|-----------------|-------------|----------------------------|----------|--------------|----------|----------|--------|----------------------------------|---------------|---------------------------|--------------------------------------------|----------|
| 363 | 795     | 2009             | Toward a 21st-century health care system: recommendations for health care reform                                                        | Annals of internal medicine                                                                                 | 3               | 1           |                            |          |              |          |          |        | Opinion                          | National      | Various                   | R                                          | 9        |
| 364 | 796     | 2009             | How to successfully select and implement electronic health records (EHR) in small ambulatory practice settings                          | BMC Medical Informatics and Decision Making                                                                 | 3               | 1           | Small Practice             |          |              |          |          |        | Opinion                          | National      | EHR                       | E                                          | 1        |
| 365 | 797     | 2009             | Patterns and changes in prescriber attitudes toward PDA prescription-assistive technology                                               | International Journal of Medical Informatics                                                                | 3               | 3           | Hospital                   |          |              |          |          |        | Pre-post interview               | Unknown       | PDA eRx                   | D                                          | 5        |
| 366 | 800     | 2009             | Organizational factors associated with the use of information systems in nursing homes                                                  | Health Care Management Review                                                                               | 3               | 3           | nursing home               |          |              |          |          |        | Cross Sectional Survey           | National      | Various                   | D                                          | 1        |
| 367 | 801     | 2009             | Knowledge management as a mediator for the efficacy of transformational leadership and quality management initiatives in US health care | Health Care Management Review                                                                               | 3               | 3           | Hospital                   |          |              |          |          |        | Cross Sectional Survey           | National      | Knowledge Mangement       | R                                          | 10       |
| 368 | 802     | 2009             | Financial incentives, quality improvement programs, and the adoption of clinical information technology                                 | Medical care                                                                                                | 3               | 3           | physician                  |          |              |          |          |        | survey/cross sectional           | national      | Various                   | R                                          | 10       |
| 369 | 803     | 2009             | Managing the complexity of a systemwide electronic medical record design and implementation: lessons for nurse leaders                  | Nursing Administration Quarterly                                                                            | 4               | 2           | Hospital                   |          |              |          |          |        | Case Study                       | National      | Various                   | R                                          | 10       |
| 370 | 805     | 2009             | Priority setting for technology adoption at a hospital level: Relevant issues from the literature                                       | Health Policy                                                                                               | 4               | 4           | Hospital                   |          |              |          |          |        | Literature Review                |               | Various                   | E                                          | 8        |
| 371 | 806     | 2009             | Clinical transformation: under pressure to alter the cost/quality paradigm, hospital organizations are turning to IT                    | Healthcare informatics: the business magazine for information and communication systems                     | 3               | 0           | hospital                   |          |              |          |          |        | News                             | national      | Various                   | E                                          | 8        |
| 372 | 808     | 2009             | Which physicians have access to electronic prescribing and which ones end up using it?                                                  | Health Policy                                                                                               | 4               | 3           | Physician                  |          |              |          |          |        | Cross Sectional / Survey         | National      | eRx                       | D                                          | 1        |
| 373 | 809     | 2009             | Redesigning care processes using an electronic health record: a system's experience                                                     | Joint Commission Journal on Quality and Patient Safety                                                      | 2               | 2           | hospital                   |          |              |          |          |        | Case Study                       | National      | Various                   | E                                          | 6        |
| 374 | 810     | 2009             | Electronic health records: Use, barriers and satisfaction among physicians who care for black and Hispanic patients                     | Journal of Evaluation in Clinical Practice                                                                  | 4               | 3           | Physician                  |          |              |          |          |        | Cross Sectional Survey           | Massachusetts | EHR                       | D                                          | 1        |
| 375 | 811     | 2009             | Physician adoption of personal digital assistants (PDA): testing its determinants within a structural equation model                    | Journal of health communication                                                                             | 4               | 3           | hospital                   |          |              |          |          |        | Pre-post implementation - Survey | New York      | PDA                       | D                                          | 1,5      |
| 376 | 814     | 2009             | Technology will have major impact on shaping future EDs, say the experts                                                                | ED Management                                                                                               | 1               | 0           | ED                         |          |              |          |          |        | News                             | Deleware      | Various                   | E                                          | 6        |
| 377 | 816     | 2009             | Health information technology--results from a roundtable discussion                                                                     | Journal of managed care pharmacy: JMCP                                                                      | 3               | 1           | Clinician                  |          |              |          |          |        | Opinion                          | National      | EHR and eRx               | D,E                                        | 3,6      |
| 378 | 817     | 2009             | Remote patient management: technology-enabled innovation and evolving business models for chronic disease care                          | Health Affairs                                                                                              | 3               | 1           | Various                    |          |              |          |          |        | Opinion                          | Various       | Remote Patient Management | D,E                                        | 8        |
| 379 | 818     | 2009             | Perspectives from nurse leaders and chief information officers on health information technology implementation                          | Hospital Topics                                                                                             | 3               | 2           | Hospital                   |          |              |          |          |        | semi-structured interviews       | Pennsylvania  | Various                   | R                                          | 10       |
| 380 | 819     | 2009             | Building capacity for a transformation initiative: system redesign at Denver Health                                                     | Health Care Management Review                                                                               | 5               | 2           | Integrated Delivery System |          |              |          |          |        | Case Study                       | Colorado      | Various                   | R                                          | 9        |
| 381 | 820     | 2009             | Community-wide implementation of health information technology: the Massachusetts eHealth Collaborative experience                      | Journal of the American Medical Informatics Association                                                     | 4               | 2           | Physician                  |          |              |          |          |        | Case Study                       | Massachusetts | EHR                       | E,R                                        | 6,9      |
| 382 | 821     | 2009             | Use of Electronic Health Records in U.S. Hopistals                                                                                      | New England Journal of Medicine                                                                             | 3               | 3           | Hospital                   |          |              |          |          |        | Survey Cross Sectional           | National      | Various                   | E,R                                        | 6,9      |
| 383 | 822     | 2010             | Community-Driven Standards-Based Electronic Laboratory Data-Sharing Networks                                                            | Public Health Reports                                                                                       | 3               | 1           | Public Health              |          |              |          |          |        | Opinion                          | National      | HIE                       | R                                          | 9        |
| 384 | 824     | 2010             | Sustained Participatory Design and Implementation of ITHC                                                                               | Information Technology in Health Care: Socio-Technical Approaches 2010. From Safe Systems to Patient Safety | 1               | 1           |                            |          |              |          |          |        | Opinion                          | National      | Various                   | E                                          | -        |

Appendix B – Coded List of Identified Data Sources

| No. | Data ID | Publication Year | Title                                                                                                                                                                                             | Journal                                                                                                 | Relevance (0-5) | Rigor (0-5) | Industry/Setting            | Patients | Practitioner | Hospital | National | Vendor | Design                              | Location    | Technology               | Punctuated Equilibrium Component (D, E, R) | Theme(s) |
|-----|---------|------------------|---------------------------------------------------------------------------------------------------------------------------------------------------------------------------------------------------|---------------------------------------------------------------------------------------------------------|-----------------|-------------|-----------------------------|----------|--------------|----------|----------|--------|-------------------------------------|-------------|--------------------------|--------------------------------------------|----------|
| 385 | 825     | 2010             | Changing around ICTs innovations is usually complex and on-going but to study it is fundamental to understand what happens when people, organizations, institutions and technology come together. | Studies in health technology and informatics                                                            | 3               | 1           | Various                     |          |              | ●        | ●        |        | Opinion                             | National    | Various                  | R                                          | 9        |
| 386 | 826     | 2010             | Hospital IT adoption strategies associated with implementation success: Implications for achieving meaningful use                                                                                 | Journal of Healthcare Management                                                                        | 3               | 1           | hospital/system             |          |              |          | ●        |        | Opinion                             | national    | Various                  | D,E                                        | 3        |
| 387 | 827     | 2010             | Millennial transformation for primary care                                                                                                                                                        | Military medicine                                                                                       | 5               | 1           | health system               | ●        |              |          |          | ●      | Opinion                             | National    | Various                  | D                                          | 1        |
| 388 | 830     | 2010             | Technological viewpoints (frames) about electronic prescribing in physician practices                                                                                                             | Journal of the American Medical Informatics Association                                                 | 3               | 2           | Ambulatory                  |          | ●            |          |          |        | Focus Group - Case Study            | Not Stated  | eRx                      | D,R                                        | 5        |
| 389 | 831     | 2010             | Change management for effective quality improvement: A primer                                                                                                                                     | American Journal of Medical Quality                                                                     | 3               | 1           | Various                     |          | ●            | ●        |          |        | Opinion                             | National    | Various                  | E                                          | 6        |
| 390 | 832     | 2010             | Computerized physician order entry: lessons learned from the trenches                                                                                                                             | Neonatal Network: The Journal of Neonatal Nursing                                                       | 3               | 2           | Hospital                    |          |              |          | ●        |        | Case Study                          | Unknown     | CPOE                     | E,R                                        | 10       |
| 391 | 833     | 2010             | Sustainable rural telehealth innovation: a public health case study                                                                                                                               | Health services research                                                                                | 3               | 2           | public Health system        |          |              |          |          | ●      | Case Study                          | Georgia     | Telehealth               | E,R                                        | 8,9      |
| 392 | 834     | 2010             | Even when Physicians Adopt E-prescribing, Use of Advanced Features Lags                                                                                                                           |                                                                                                         | 2               | 3           | Physician                   |          | ●            |          |          |        | Cross Sectional Survey              | National    | eRx                      | D                                          | 1,3      |
| 393 | 835     | 2010             | Barriers to cross-institutional health information exchange: a literature review                                                                                                                  | Journal of healthcare information management: JHIM                                                      | 4               | 4           | National                    |          |              |          |          | ●      | Literature Review                   | National    | HIE                      | D,E                                        | 4,6      |
| 394 | 837     | 2010             | Electronic medical record systems in critical access hospitals: leadership perspectives on anticipated and realized benefits                                                                      | Perspectives in Health Information Management/AHIMA, American Health Information Management Association | 4               | 2           | Hospital                    |          |              |          | ●        |        | Case Study/Focus Group              | Iowa        | EHR                      | E                                          | 8        |
| 395 | 838     | 2010             | EHR acceptance factors in ambulatory care: a survey of physician perceptions                                                                                                                      | Perspectives in Health Information Management/AHIMA, American Health Information Management Association | 3               | 3           | Hospital                    |          | ●            |          |          |        | Cross Sectxional Survey             | Mississippi | EHR                      | D                                          | 5        |
| 396 | 839     | 2010             | The effects of innovation factors on smartphone adoption among nurses in community hospitals                                                                                                      | Perspectives in Health Information Management/AHIMA, American Health Information Management Association | 3               | 3           | Hospital                    |          | ●            |          |          |        | Cross Sectional                     | SouthEast   | SmartPhone               | R                                          | 9        |
| 397 | 841     | 2010             | 'Meaningful use'hoists hospital IT to next level                                                                                                                                                  | Hospitals & health networks/AHA                                                                         | 1               | 0           | Hospital                    |          |              |          | ●        |        | news                                | National    | Various                  | D                                          | 3        |
| 398 | 845     | 2010             | Transforming nursing workflow, part 1: the chaotic nature of nurse activities                                                                                                                     | Journal of nursing administration                                                                       | 1               | 2           | Hospital                    |          | ●            |          |          |        | Case Study / Work-time analysis     | Kansas      | Various                  | E                                          | -        |
| 399 | 846     | 2010             | Clinical decision support: progress and opportunities                                                                                                                                             | Journal of the American Medical Informatics Association                                                 | 3               | 1           | national                    |          |              |          |          | ●      | Opinion                             | National    | CDSS                     | R                                          | 9        |
| 400 | 847     | 2010             | The Internet and the physician-patient relationship                                                                                                                                               | Clinical Orthopaedics and Related Research                                                              | 3               | 1           | Various                     | ●        | ●            |          |          |        | Opinion                             | National    | Internet                 | D                                          | 1        |
| 401 | 848     | 2010             | Reducing disparities in health care quality: the role of health it in underresourced settings                                                                                                     | Medical Care Research and Review                                                                        | 2               | 2           | Hospital (Safety Net)       |          |              |          | ●        |        | Focus Group                         | national    | Various                  | D                                          | 1        |
| 402 | 854     | 2010             | Critical access: the need to connect. Connecting midsize hospitals to rural critical access hospitals is important to the growth of both--but there are things larger hospitals need to know      | Healthcare informatics: the business magazine for information and communication systems                 | 3               | 0           | hospitals - Critical Access |          |              |          | ●        |        | News/Opinion                        | National    | EHR                      | D                                          | 1        |
| 403 | 856     | 2010             | Transforming nursing workflow, part 2: the impact of technology on nurse activities                                                                                                               | Journal of nursing administration                                                                       | 3               | 3           | Hospital                    |          | ●            |          |          |        | Pre-Post Workflow Study             | Unknown     | Medication documentation | E                                          | 9        |
| 404 | 857     | 2010             | A progress report on electronic health records in US hospitals                                                                                                                                    | Health Affairs                                                                                          | 5               | 3           | hospital                    |          |              |          | ●        |        | Cross Sectional Survey              | National    | EHR                      | D                                          | 1        |
| 405 | 859     | 2010             | Project HealthDesign: Rethinking the power and potential of personal health records                                                                                                               | Journal of biomedical informatics                                                                       | 3               | 2           | home                        | ●        |              |          |          |        | Case Study                          | Various     | PHR                      | R                                          | 9        |
| 406 | 860     | 2010             | Smart leadership! Finding the right mix of minds to manage the future                                                                                                                             | Hospitals & health networks/AHA                                                                         | 3               | 0           | Hospital                    |          |              |          |          |        | news                                | national    | Various                  | D,R                                        | 3,10     |
| 407 | 863     | 2010             | Developing and validating a model to predict the success of an IHCS implementation: the Readiness for Implementation Model                                                                        | Journal of the American Medical Informatics Association                                                 | 4               | 4           | Various                     | ●        |              | ●        |          |        | Longitudinal Study Validating model | National    | IHCS (PHR)               | D                                          | 5        |
| 408 | 864     | 2010             | For hospitals and meaningful use, context is everything                                                                                                                                           | Hospitals and health networks                                                                           | 3               | 0           | Hospital                    |          | ●            | ●        |          | ●      | News                                | National    | Various                  | D                                          | 1        |



Appendix B – Coded List of Identified Data Sources

| No. | Data ID | Publication Year | Title                                                                                                                             | Journal                                                                                                 | Relevance (0-5) | Rigor (0-5) | Industry/Setting  | Patients | Practitioner | Hospital | National | Vendor | Design                      | Location                        | Technology | Punctuated Equilibrium Component (D, E, R) | Theme(s) |
|-----|---------|------------------|-----------------------------------------------------------------------------------------------------------------------------------|---------------------------------------------------------------------------------------------------------|-----------------|-------------|-------------------|----------|--------------|----------|----------|--------|-----------------------------|---------------------------------|------------|--------------------------------------------|----------|
| 409 | 865     | 2010             | Avoiding the trap in the HITECH Act's incentive timeframe for implementing the EHR                                                | Journal of Health Care Finance                                                                          | 2               | 0           | Hospital          |          |              |          |          |        | News/opinion                | National                        | EHR        | E                                          | 6        |
| 410 | 867     | 2010             | The impact of electronic medical record systems on outpatient workflows: A longitudinal evaluation of its workflow effects        | International Journal of Medical Informatics                                                            | 4               | 4           | outpatient clinic |          |              |          |          |        | Mixed                       | Buffalo                         | EMR        | D                                          | 1        |
| 411 | 868     | 2010             | A comparison of the adoption of electronic health records in North Carolina and South Carolina HIV systems                        | Southern Medical Journal                                                                                | 3               | 3           | Health System     |          |              |          |          |        | Comparative case Study      | North Carolina - South Carolina | EHR        | R                                          | 9        |
| 412 | 872     | 2010             | 7 strategies for improving HITECH readiness                                                                                       | Healthcare financial management: journal of the Healthcare Financial Management Association             | 3               | 0           | Hospital          |          |              |          |          |        | News/opinion                | National                        | EHR        | D,R                                        | 3,9      |
| 413 | 874     | 2010             | Health information technology: integration of clinical workflow into meaningful use of electronic health records                  | Perspectives in Health Information Management/AHIMA, American Health Information Management Association | 2               | 1           | Ambulatory        |          |              |          |          |        | Opinion                     | National                        | EHR        | D                                          | 3        |
| 414 | 876     | 2010             | The regional extension center program: helping physicians meaningfully use health information technology                          | Annals of internal medicine                                                                             | 4               | 1           | Various           |          |              |          |          |        | News/Opinion                | National                        | EHR        | D,R                                        | 3,9      |
| 415 | 877     | 2010             | Kaiser Permanente's Performance Improvement System, Part 1: From Benchmarking to Executing on Strategic Priorities                | Joint Commission Journal on Quality and Patient Safety                                                  | 4               | 2           | IDS - Kaiser      |          |              |          |          |        | Case Study                  | National                        | Various    | E                                          | 9        |
| 416 | 880     | 2010             | More than just a question of technology: Factors related to hospitals' adoption and implementation of health information exchange | International Journal of Medical Informatics                                                            | 5               | 3           | hospitals         |          |              |          |          |        | Cross Sectional Survey      | National                        | HIE        | D                                          | 5        |
| 417 | 882     | 2010             | What you need to know about meaningful use                                                                                        | Hospitals & health networks/AHA                                                                         | 2               | 0           | Hospital          |          |              |          |          |        | News                        | National                        | EHR        | D,R                                        | 3        |
| 418 | 883     | 2010             | 'No physician left behind' is an IT priority for hospitals                                                                        | Hospitals & health networks/AHA                                                                         | 2               | 0           | hospital          |          |              |          |          |        | News                        | national                        | EHR        | R                                          | 9        |
| 419 | 885     | 2010             | The influence of context on quality improvement success in health care: a systematic review of the literature                     | Milbank Quarterly                                                                                       | 3               | 5           | Various           |          |              |          |          |        | Systematic Review           | International                   | Various    | R                                          | 10       |
| 420 | 886     | 2010             | EHR adoption among doctors who treat the elderly                                                                                  | Journal of Evaluation in Clinical Practice                                                              | 3               | 3           | Outpatient        |          |              |          |          |        | Cross Sectional Survey      | Florida                         | EHR        | D                                          | 1        |
| 421 | 887     | 2010             | Evaluating the impact of investments in information technology on structural inertia in health organizations                      | US Army Medical Department journal                                                                      | 5               | 1           | Various           |          |              |          |          |        | Opinion / model development | National                        | Various    | D                                          | 2,5      |
| 422 | 889     | 2010             | Nursing and technology: a love/hate relationship                                                                                  | Nursing economic\$                                                                                      | 4               | 1           | Nursing           |          |              |          |          |        | Opinion                     | National                        | Various    | E                                          | 6        |
| 423 | 890     | 2010             | Uniting the tribes of health system improvement                                                                                   | American Journal of Managed Care                                                                        | 4               | 1           | National Setting  |          |              |          |          |        | Opinion                     | national                        | Various    | R                                          | 9        |
| 424 | 891     | 2010             | HITECH Lays the Foundation for More Ambitious Outcomes-Based Reimbursement                                                        | The American journal of managed care                                                                    | 5               | 1           | National System   |          |              |          |          |        | opinion                     | National                        | Various    | D,R                                        | 3        |
| 425 | 892     | 2010             | Congressional intent for the HITECH Act                                                                                           | Am J Manag Care                                                                                         | 3               | 1           | National          |          |              |          |          |        | Opinion                     | National                        | Various    | D,R                                        | 3        |
| 426 | 893     | 2010             | Smart health community: the hidden value of health information exchange                                                           | Am J Manag Care                                                                                         | 5               | 1           | National          |          |              |          |          |        | Opinion                     | National                        | Various    | R                                          | 9        |
| 427 | 894     | 2010             | Increasing consumerism in healthcare through intelligent information technology                                                   | The American journal of managed care                                                                    | 5               | 1           | national          |          |              |          |          |        | Opinion                     | National                        | Various    | R                                          | 9        |
| 428 | 895     | 2010             | Physician ePortfolio: the missing piece for linking performance with improvement                                                  | The American journal of managed care                                                                    | 4               | 1           | Clinician         |          |              |          |          |        | Opinion                     | National                        | Various    | E                                          | 6        |
| 429 | 896     | 2010             | Achieving meaningful use: a health system perspective                                                                             | Am J Manag Care                                                                                         | 3               | 2           | Health System     |          |              |          |          |        | Case Study                  | Massachusetts                   | EHR        | R                                          | 10       |
| 430 | 899     | 2010             | Electronic health information in use: Characteristics that support employee workflow and patient care                             | Health Informatics Journal                                                                              | 2               | 2           | IDS (VA)          |          |              |          |          |        | Focus Group                 | Unknown                         | EHR        | E                                          | -        |
| 431 | 901     | 2011             | Clinical decision support in small community practice settings: a case study                                                      | Journal of the American Medical Informatics Association                                                 | 2               | 2           | IPA               |          |              |          |          |        | Case Study                  | Oregon                          | EHR        | E                                          | 6        |
| 432 | 903     | 2011             | Surviving OR Computerization                                                                                                      | AORN                                                                                                    | 3               | 2           | hospital          |          |              |          |          |        | case study                  | West Virginia                   | EHR / OR   | E                                          | 6        |
| 433 | 904     | 2011             | Phased implementation of electronic health records through an office of clinical transformation                                   | Journal of the American Medical Informatics Association                                                 | 2               | 2           | Hospital          |          |              |          |          |        | Case Study                  | Virginia                        | EHR        | E                                          | 6        |

Appendix B – Coded List of Identified Data Sources

| No. | Data ID | Publication Year | Title                                                                                                                                                       | Journal                                                                                                 | Relevance (0-5) | Rigor (0-5) | Industry/Setting            | Patients | Practitioner | Hospital | National | Vendor | Design                 | Location                | Technology                       | Punctuated Equilibrium Component (D, E, R) | Theme(s) |
|-----|---------|------------------|-------------------------------------------------------------------------------------------------------------------------------------------------------------|---------------------------------------------------------------------------------------------------------|-----------------|-------------|-----------------------------|----------|--------------|----------|----------|--------|------------------------|-------------------------|----------------------------------|--------------------------------------------|----------|
| 434 | 905     | 2011             | From promise to reality: achieving the value of an EHR                                                                                                      | Healthcare financial management: journal of the Healthcare Financial Management Association             | 2               | 0           | Hospital                    |          |              |          |          |        | Opinion                | National                | EHR                              | R                                          | 10       |
| 435 | 908     | 2011             | Being mindful of change: a technique to reduce stress amid change                                                                                           | Journal of AHIMA/American Health Information Management Association                                     | 2               | 1           |                             |          |              |          |          |        | Opinion                | National                | Various                          | E                                          | 6        |
| 436 | 911     | 2011             | Staying Afloat in a Sea of Digital Waves                                                                                                                    | Journal of Nursing Administration                                                                       | 3               | 1           |                             |          |              |          |          |        | Opinion                | National                | Various                          | D                                          | 2        |
| 437 | 913     | 2011             | Innovation in Indian healthcare: using health information technology to achieve health equity for American Indian and Alaska Native populations             | Perspectives in Health Information Management/AHIMA, American Health Information Management Association | 2               | 1           | Indian Health Service / IDS |          |              |          |          |        | Opinion                | Naitonal                | EHR and telehealth               | E                                          | 6        |
| 438 | 915     | 2011             | A partnership model for implementing electronic health records in resource-limited primary care settings: experiences from two nurse-managed health centers | Journal of the American Medical Informatics Association                                                 | 3               | 3           | Health Centers              |          |              |          |          |        | comparative Case Study | California and Michigan | EHR                              | E                                          | 6        |
| 439 | 916     | 2011             | Not so fast: IOM report warns of danger in rushing IT training, as providers, vendors push for keeping safety reporting voluntary                           | Modern healthcare                                                                                       | 3               | 4           | hospital                    |          |              |          |          |        | Opinion (IOM)          | National                | Various                          | D,E                                        | 1,6      |
| 440 | 918     | 2011             | Meaningful use of electronic prescribing in 5 exemplar primary care practices                                                                               | The Annals of Family Medicine                                                                           | 3               | 3           | Primary Care                |          |              |          |          |        | Comparative Case Study | Unknown                 | eRx                              | D,E                                        | 3,6      |
| 441 | 919     | 2011             | Seeking the United State of HIEs-Connecting Information Exchange Efforts is ONC's Next Challenge                                                            | Journal of the American Health Information Management Association                                       | 3               | 1           | National System             |          |              |          |          |        | Opinion                | National                | HIE                              | D,R                                        | 3,9      |
| 442 | 920     | 2011             | 7 for 11. Health information management and technology stories to watch in 2011                                                                             | Journal of AHIMA/American Health Information Management Association                                     | 2               | 1           | Various                     |          |              |          |          |        | Opinion                | National                | Various                          | D,R                                        | 3,9      |
| 443 | 922     | 2011             | Meaningful use in radiology                                                                                                                                 | Journal of the American College of Radiology                                                            | 1               | 1           | Radiology                   |          |              |          |          |        | Opiniopn               | National                | EHR                              | D,R                                        | 3,9      |
| 444 | 925     | 2011             | A re-conceptualization of access for 21st century healthcare                                                                                                | Journal of General Internal Medicine                                                                    | 5               | 1           | Practitioner                |          |              |          |          |        | Opinion                | national                | e-health                         | R                                          | 9        |
| 445 | 926     | 2011             | Emerging Perspectives on Transforming the Healthcare System: Redesign Strategies and a Call for Needed Research                                             | Medical Care                                                                                            | 5               | 1           | Various                     |          |              |          |          |        | Opinion                | National                | Various                          | D,R                                        | 2,9      |
| 446 | 927     | 2011             | The brave, new world of HIEs                                                                                                                                | Healthcare financial management: journal of the Healthcare Financial Management Association             | 3               | 0           | Various                     |          |              |          |          |        | Opinion                | National                | HIE                              | E                                          | 6        |
| 447 | 933     | 2011             | Informatics-Enabled Behavioral Medicine in Oncology                                                                                                         | The Cancer Journal                                                                                      | 2               | 1           | Practitioner                |          |              |          |          |        | Opinion                | national                | EHR / PHR                        | E                                          | -        |
| 448 | 934     | 2011             | How CEOs drive the clinical transformation and information technology agenda                                                                                | Frontiers of health services management                                                                 | 2               | 1           | hospital                    |          |              |          |          |        | Opinion                | Maine                   | Various                          | E,R                                        | 10       |
| 449 | 938     | 2011             | Community-Based Health Information Technology Alliances: Potential Predictors of Early Sustainability- Page 2                                               | Am J Manag Care                                                                                         | 3               | 3           | HIE/RHIO                    |          |              |          |          |        | Cross Sectional Survey | New York                | HIE                              | D                                          | 1        |
| 450 | 939     | 2011             | Introduction of an electronic medical record system into physician practice offices: why is it so#! &-ing hard for everybody?--Part III                     | The Journal of medical practice management: MPM                                                         | 2               | 0           | practitioner                |          |              |          |          |        | Opinion                | national                | EHR                              | D,E                                        | 2,6      |
| 451 | 942     | 2011             | E-patient Connectivity and the Near Term Future                                                                                                             | Journal of General Internal Medicine                                                                    | 4               | 1           | Home Care                   |          |              |          |          |        | Opinion                | National                | connected health - remote health | R                                          | 9        |
| 452 | 946     | 2011             | Computerized physician order entry in the critical care environment: a review of current literature                                                         | Journal of Intensive Care Medicine                                                                      | 3               | 1           | Hospital                    |          |              |          |          |        | Opinion                | National                | CPOE                             | D                                          | 1        |
| 453 | 948     | 2011             | An Early Status Report on the Beacon Communities' Plans for Transformation via Health Information Technology                                                | Health Affairs                                                                                          | 3               | 1           | Beacon Communities          |          |              |          |          |        | Opinion                | National                | Various                          | D,R                                        | 3,9      |
| 454 | 950     | 2011             | Florida Doctors Seeing Medicaid Patients Show Broad Interest In Federal Incentives For Adopting Electronic Health Records                                   | Health Affairs                                                                                          | 3               | 3           | Ambulatory                  |          |              |          |          |        | Cross Sectional Survey | Florida                 | EHR                              | D,R                                        | 3,9      |
| 455 | 951     | 2011             | Environmental factors and health information technology management strategy                                                                                 | Health Care Management Review                                                                           | 5               | 3           | Hospital                    |          |              |          |          |        | Cross Sectional        | Naitonal                | Various                          | D,E                                        | 1,7      |
| 456 | 953     | 2011             | Experts in Short Supply                                                                                                                                     | Trustee: the journal for hospital governing boards                                                      | 3               | 0           | Hospital                    |          |              |          |          |        | Opinion                | National                | Various                          | D                                          | 1        |

Appendix B – Coded List of Identified Data Sources

| No. | Data ID | Publication Year | Title                                                                                                                                                                                                                              | Journal                                                                                 | Relevance (0-5) | Rigor (0-5) | Industry/Setting         | Patients | Practitioner | Hospital | National | Vendor | Design                   | Location                | Technology                                      | Punctuated Equilibrium Component (D, E, R) | Theme(s) |
|-----|---------|------------------|------------------------------------------------------------------------------------------------------------------------------------------------------------------------------------------------------------------------------------|-----------------------------------------------------------------------------------------|-----------------|-------------|--------------------------|----------|--------------|----------|----------|--------|--------------------------|-------------------------|-------------------------------------------------|--------------------------------------------|----------|
|     |         |                  |                                                                                                                                                                                                                                    |                                                                                         |                 |             |                          |          |              |          |          |        |                          |                         |                                                 |                                            |          |
| 457 | 954     | 2011             | Addressing the business of discharge: Building a case for an electronic discharge summary                                                                                                                                          | Journal of Hospital Medicine                                                            | 3               | 2           | Hospital                 |          |              |          |          |        | Case Study               | California (UCSF)       | EMR                                             | E                                          | 6        |
| 458 | 955     | 2011             | Factors affecting home care patients' acceptance of a web-based interactive self-management technology                                                                                                                             | Journal of the American Medical Informatics Association                                 | 3               | 5           | Hospital                 | ●        |              |          |          |        | RCT                      | Unknown                 | CHIT (Consumer health information technologies) | D,R                                        | 5,9      |
| 459 | 958     | 2011             | A conceptual framework for achieving balance between innovation and resilience in optimizing emergency department operations                                                                                                       | The Health Care Manager                                                                 | 3               | 3           | Hospital                 |          |              | ●        |          |        | Literture Review         | National                | Various                                         | D                                          | 2        |
| 460 | 960     | 2011             | Consumer attitudes toward personal health records in a beacon community                                                                                                                                                            | The American journal of managed care                                                    | 3               | 3           | Community                | ●        |              |          |          |        | Cross Sectional Survey   | New york                | PHR                                             | D                                          | 1        |
| 461 | 962     | 2011             | Mobile Technology: Implementing a Web-Based Home Monitoring System within an Academic Health Care Network: Barriers and Facilitators to Innovation Diffusion                                                                       | Journal of diabetes science and technology                                              | 4               | 2           | Health System (Partners) |          |              | ●        |          |        | Case Study               | Massachusetts           | TeleHealth                                      | D                                          | 5        |
| 462 | 964     | 2011             | Ramping up: Healthcare IT leaders begin the serious work of preparing for the transition to ICD-10                                                                                                                                 | Healthcare informatics: the business magazine for information and communication systems | 1               | 0           | Hospital                 |          |              | ●        |          |        | Opinion                  | National                | ICD-10                                          | D                                          | 3        |
| 463 | 965     | 2011             | Use of Health Information to Improve Care                                                                                                                                                                                          | NC Med J                                                                                | 2               | 2           | Beacon community         |          |              |          | ●        |        | Case Study               | north carolina          | Various                                         | D                                          | 3        |
| 464 | 972     | 2011             | Testing the Technology Acceptance Model: HIV case managers' intention to use a continuity of care record with context-specific links                                                                                               | Informatics for Health and Social Care                                                  | 3               | 3           | Health System            |          | ●            |          |          |        | Cross Sectional / Survey | New York                | EHR/CCD                                         | D                                          | 5        |
| 465 | 978     | 2011             | Adoption of anesthesia information management systems by US anesthesiologists                                                                                                                                                      | Journal of clinical monitoring and computing                                            | 3               | 3           | Practitioner             |          | ●            |          |          |        | Cross Sectional Survey   | national                | EHR / AIMS                                      | D                                          | 3        |
| 466 | 979     | 2011             | Explaining physicians' use of EMR systems and performance in the shakedown phase                                                                                                                                                   | Journal of the American Medical Informatics Association                                 | 5               | 3           | Various                  | ●        | ●            |          |          |        | Cross Sectional Survey   | Unknown                 | EHR                                             | D                                          | 1,5      |
| 467 | 980     | 2011             | Biomedical informatics: changing what physicians need to know and how they learn                                                                                                                                                   | Academic Medicine                                                                       | 2               | 1           | Education - Practitioner |          | ●            |          |          |        | Opinion                  | national                | Various                                         | R                                          | 9        |
| 468 | 981     | 2011             | Disrupting Incrementalism in Health Care Innovation                                                                                                                                                                                | Annals of surgery                                                                       | 5               | 1           | national                 | ●        | ●            | ●        | ●        | ●      | opinion                  | National                | Various                                         | D                                          | 2        |
| 469 | 989     | 2008             | Personal health record use by patients as perceived by ambulatory care physicians in Nebraska and South Dakota: a cross sectional study                                                                                            | Perspectives in Health Information Management                                           | 3               | 3           | Ambulatory               |          | ●            |          |          |        | Cross Sectional Survey   | Nebraska - South Dakota | PHR                                             | D                                          | -        |
| 470 | 990     | 2010             | Stratifying Computer Literacy: A Competency Measurement Strategy                                                                                                                                                                   | Computers, Informatics, Nursing                                                         | 3               | 1           | Nursing                  |          | ●            |          |          |        | Opinion                  | National                | EHR                                             | D                                          | 1        |
| 471 | 993     | 2009             | A critical review of the research literature on Six Sigma, Lean and StuderGroup's Hardwiring Excellence in the United States: the need to demonstrate and communicate the effectiveness of transformation strategies in healthcare | Implementation Science                                                                  | 5               | 4           | National System          |          |              |          | ●        |        | Systematic Review        | Naitonal                | Various                                         | E                                          | 8        |
| 472 | 998     | 2009             | Paper Versus Electronic Medical Records: The Effects of Access on Physicians' Decisions to Use Complex Information Technologies                                                                                                    | Decision Sciences                                                                       | 4               | 3           | Hospital                 |          | ●            |          |          |        | Cross Sectional Survey   | Southesat               | EHR                                             | R                                          | 9        |
| 473 | 999     | 2005             | The Costs of a National Health Information Network                                                                                                                                                                                 | The Annals of Internal Medicine                                                         | 4               | 1           | National System          |          |              |          | ●        |        | Expert Opinion           | National                | HIE/NHIN                                        | R                                          | 9        |
| 474 | 1001    | 2008             | Health Information Technology: A Few Years of Magical Thinking?                                                                                                                                                                    | Health Affairs                                                                          | 5               | 1           | Naitonal                 |          |              |          | ●        |        | Opinion                  | National                | Various                                         | D,R                                        | 3,4,9    |
| 475 | 1002    | 2004             | CHT Initiative Pushes for Stronger Systems                                                                                                                                                                                         | Health Management Technology                                                            | 1               | 0           | National                 |          |              |          | ●        |        | News                     | National                | Various                                         | R                                          | -        |
| 476 | 1003    | 2005             | pay for performance: a win for the NHIN?                                                                                                                                                                                           | Healthcare Financial Management                                                         | 4               | 1           | Various                  |          |              |          | ●        |        | opinion                  | national                | NHIN                                            | D,R                                        | 4,9      |
| 477 | 1004    | 2006             | The Best Medical Care In The U.S.: How Veterans Affairs transformed itself--and what it means for the rest of us                                                                                                                   | Health Hospitals                                                                        | 4               | 0           | hospital - VA            |          |              | ●        | ●        |        | News                     | national                | Various                                         | R                                          | 10       |
