# Supplementary material
Source: PubMed Central journal article supplement (PMC4684715)
Supplement: NIHMS732570-supplement-2.pdf [file NIHMS732570-supplement-2.pdf]

## Appendix A – Specific Search Strategies

### A. Medline/PubMed

1. Technology. Or technology.mp
2. limit 1 to abstracts
3. Informatics/ or informatics.mp
4. Limit 3 to abstracts
5. Information systems.mp or information systems/
6. Limit 5 to abstracts
7. Practice framework.mp
8. Limit 7 to abstracts
9. 2 or 4 or 6 or 8
10. organizational change.mp or organizational change/
11. limit 10 to abstracts
12. organizational innovation.mp or organizational innovation
13. limit 12 to abstracts
14. transformation.mp
15. limit 14 to abstracts
16. organizational innovation/ or innovation.mp
17. limit 16 to abstracts
18. 11 or 13 or 15 or 17
19. 9 and 18
20. limit 19 to (English language and yr="2004 – current")

### B. Social Science Research Network

1. Technology AND transformation and health
2. 2004 to current

### C. Business Source Complete

1. AB (technology or "information system") AND AB (transformation or "organizational change") AND TX (health or healthcare or medicine)
2. Publication Date 2004 – 2012

### D. Web of Knowledge

Source articles for ancestry search

1. Anderson, P., & Tushman, M. L. (1990). Technological discontinuities and dominant designs: A cyclical model of technological change. *Administrative Science Quarterly*, 604-633
2. Gersick, C. J. G. (1991). Revolutionary change theories: A multilevel exploration of the punctuated equilibrium paradigm. *Academy of Management Review*, 10-36.
3. Tushman, M. L., & Romanelli, E. (1985). Organizational evolution: A metamorphosis model of convergence and reorientation. *Research in organizational behavior*.

E. Factiva

Search Summary

Text Technology and transformation and health and delivery and innovation

Date 01/01/2004 to 12/31/2012

Source Dow Jones Newswire Not Press Release Wires Not Reuters Newswires

Company All Companies

Subject All subjects

Industry Not Accounting/Consulting Not Advertising/Public Relations/Marketing Not Aerospace/Defense Not Agriculture/Forestry Not Automobiles Not Banking/Credit Not Biotechnology Not Business/Consumer Services Not Chemicals Not Clothing/Textiles Not Computers/Electronics Not Construction/Real Estate Not Consumer Products Not Energy Not Environment/Waste Management Not Food/Beverages/Tobacco Not Hotels/Restaurants/Casinos Not Insurance Not Internet/Online Services Not Investing/Securities Not Leisure/Arts Not Machinery/Industrial Goods Not Media Not Metals/Mining Not Paper/Packaging Not Pharmaceuticals Not Retail/Wholesale Not Telecommunications Not Transportation/Shipping Not Medical/Surgical Materials Not Medical/Surgical Instruments/Apparatus/Devices Not Medical/Clinical/Diagnostic Services Not Veterinary Services

Region Not South America Not St. Pierre and Miquelon Not Mexico Not Greenland Not Canada Not Bermuda Not Africa Not Antarctica Not Asia Not Asia Pacific Not Australia/Oceania Not Caribbean Islands Not Central America Not CIS Countries Not Developing Economies Not Emerging Market Countries Not Europe Not Latin America Not Mediterranean Not Middle East

Language English
